# Supplementary material for: Vestibular syndromes, diagnosis and diagnostic errors in patients with dizziness presenting to the emergency department: a cross-sectional study
Source: PubMed Central journal article supplement (PMC10040076; doi:10.1136/bmjopen-2022-064057), 2023-03-24
Supplement: bmjopen-2022-064057.draft_revisions.pdf [file bmjopen-2022-064057.draft_revisions.pdf]

# BMJ Open

BMJ Open is committed to open peer review. As part of this commitment we make the peer review history of every article we publish publicly available.

When an article is published we post the peer reviewers' comments and the authors' responses online. We also post the versions of the paper that were used during peer review. These are the versions that the peer review comments apply to.

The versions of the paper that follow are the versions that were submitted during the peer review process. They are not the versions of record or the final published versions. They should not be cited or distributed as the published version of this manuscript.

BMJ Open is an open access journal and the full, final, typeset and author-corrected version of record of the manuscript is available on our site with no access controls, subscription charges or pay-per-view fees (<http://bmjopen.bmj.com>).

If you have any questions on BMJ Open's open peer review process please email [info.bmjopen@bmj.com](mailto:info.bmjopen@bmj.com)

# BMJ Open

## Vestibular syndromes, diagnosis and diagnostic errors in dizzy patients presenting to the emergency department.

|                               |                                                                                                                                                                                                                                                                                                                                                                                                                                                                                                                                                                                                                                                                                                                                                                                                                                                  |
|-------------------------------|--------------------------------------------------------------------------------------------------------------------------------------------------------------------------------------------------------------------------------------------------------------------------------------------------------------------------------------------------------------------------------------------------------------------------------------------------------------------------------------------------------------------------------------------------------------------------------------------------------------------------------------------------------------------------------------------------------------------------------------------------------------------------------------------------------------------------------------------------|
| Journal:                      | <i>BMJ Open</i>                                                                                                                                                                                                                                                                                                                                                                                                                                                                                                                                                                                                                                                                                                                                                                                                                                  |
| Manuscript ID                 | bmjopen-2022-064057                                                                                                                                                                                                                                                                                                                                                                                                                                                                                                                                                                                                                                                                                                                                                                                                                              |
| Article Type:                 | Original research                                                                                                                                                                                                                                                                                                                                                                                                                                                                                                                                                                                                                                                                                                                                                                                                                                |
| Date Submitted by the Author: | 20-Apr-2022                                                                                                                                                                                                                                                                                                                                                                                                                                                                                                                                                                                                                                                                                                                                                                                                                                      |
| Complete List of Authors:     | Comolli, Lukas; University of Bern, Department of Otorhinolaryngology, Head and Neck Surgery<br>Korda, Athanasia; University of Bern, Department of Otorhinolaryngology, Head and Neck Surgery<br>Zamaro, Ewa; University of Bern, Department of Otorhinolaryngology, Head and Neck Surgery<br>Wagner, Franca; University of Bern, Department of Diagnostic and Interventional Neuroradiology<br>Sauter, Thomas; Inselspital Universitatsspital Bern, Emergency department<br>Caversaccio, M ; University of Bern, Department of Otorhinolaryngology, Head and Neck Surgery<br>Nikles, Florence; University of Bern, Department of Otorhinolaryngology, Head and Neck Surgery<br>Jung, Simon; University of Bern, Department of Neurology<br>Mantokoudis, Georgios; University of Bern, Department of Otorhinolaryngology, Head and Neck Surgery |
| Keywords:                     | Neurotology < OTOLARYNGOLOGY, OTOLARYNGOLOGY, Neurology < INTERNAL MEDICINE, Stroke < NEUROLOGY                                                                                                                                                                                                                                                                                                                                                                                                                                                                                                                                                                                                                                                                                                                                                  |
|                               |                                                                                                                                                                                                                                                                                                                                                                                                                                                                                                                                                                                                                                                                                                                                                                                                                                                  |

SCHOLARONE™  
Manuscripts

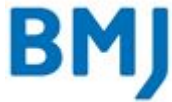

I, the Submitting Author has the right to grant and does grant on behalf of all authors of the Work (as defined in the below author licence), an exclusive licence and/or a non-exclusive licence for contributions from authors who are: i) UK Crown employees; ii) where BMJ has agreed a CC-BY licence shall apply, and/or iii) in accordance with the terms applicable for US Federal Government officers or employees acting as part of their official duties; on a worldwide, perpetual, irrevocable, royalty-free basis to BMJ Publishing Group Ltd ("BMJ") its licensees and where the relevant Journal is co-owned by BMJ to the co-owners of the Journal, to publish the Work in this journal and any other BMJ products and to exploit all rights, as set out in our [licence](#).

The Submitting Author accepts and understands that any supply made under these terms is made by BMJ to the Submitting Author unless you are acting as an employee on behalf of your employer or a postgraduate student of an affiliated institution which is paying any applicable article publishing charge ("APC") for Open Access articles. Where the Submitting Author wishes to make the Work available on an Open Access basis (and intends to pay the relevant APC), the terms of reuse of such Open Access shall be governed by a Creative Commons licence – details of these licences and which [Creative Commons](#) licence will apply to this Work are set out in our licence referred to above.

Other than as permitted in any relevant BMJ Author's Self Archiving Policies, I confirm this Work has not been accepted for publication elsewhere, is not being considered for publication elsewhere and does not duplicate material already published. I confirm all authors consent to publication of this Work and authorise the granting of this licence.

1  
2  
3 1 **TITLE**  
4

5 2 Vestibular syndromes, diagnosis and diagnostic errors in dizzy patients presenting to the emergency  
6  
7 3 department.  
8  
9

10 4  
11  
12 5 **AUTHORS**  
13

14  
15 6 Lukas Comolli<sup>1</sup>, Athanasia Korda<sup>1</sup>, Ewa Zamaro<sup>1</sup>, Franca Wagner<sup>2</sup>, Thomas C. Sauter<sup>3</sup>, Marco D.  
16  
17 7 Caversaccio<sup>1</sup>, Florence Nikles<sup>1</sup>, Simon Jung<sup>4</sup>, Georgios Mantokoudis<sup>1</sup>  
18  
19

20 8  
21  
22 9 **Affiliations:**  
23

24  
25 10 1 Department of Otorhinolaryngology, Head and Neck Surgery, Inselspital, University Hospital Bern  
26  
27 11 and University of Bern, Bern, Switzerland.  
28

29  
30 12 2 Department of Diagnostic and Interventional Neuroradiology, Inselspital, University Hospital Bern  
31  
32 13 and University of Bern, Bern, Switzerland.  
33

34 14 3 Department of Emergency Medicine, Inselspital, University Hospital Bern and University of Bern,  
35  
36 15 Bern, Switzerland.  
37

38 16 4 Department of Neurology, University Hospital Bern and University of Bern, Bern, Switzerland.  
39  
40

41 17 **Word count:** 3953  
42

43  
44 18 **Corresponding author:**

45 19 Prof. Dr. med. Georgios Mantokoudis  
46  
47 20 Head of Otology and Cochlear Implant Dpt  
48  
49 21 University Department of Otorhinolaryngology,  
50  
51 22 Head and Neck Surgery, Inselspital Bern,  
52  
53 23 3010 Bern, Switzerland  
54

55  
56 25 Office: +41 31 632 33 22  
57

58 26 Email: [georgios.mantokoudis@insel.ch](mailto:georgios.mantokoudis@insel.ch)  
59

60 27 Website: <http://hno.insel.ch>

1  
2  
3 28 **ABSTRACT**  
4

5 29 **Objectives:** Our aim was to determine the frequency of vestibular syndromes, diagnoses, diagnostic  
6  
7 30 errors and resources used in patients with dizziness in the emergency department (ED).  
8  
9

10 31 **Design:** Retrospective cross-sectional study  
11

12 32 **Setting:** Tertiary referral hospital  
13

14  
15 33 **Participants:** Adult patients presenting with dizziness  
16

17  
18 34 **Primary and secondary outcome measures:** We collected clinical data from the initial ED report  
19  
20 35 from 07/2015 until 08/2020 and compared with the follow-up report if available. We calculated the  
21  
22 36 prevalence of vestibular syndromes and stroke prevalence in dizzy patients. We reported the rate of  
23  
24 37 diagnostic errors using the follow-up diagnosis as reference standard.  
25

26 38 **Results:** We included 1535 patients with dizziness. 19.7% (303) of the patients presented with acute  
27  
28 39 vestibular syndrome (AVS), 34.7% (533) with episodic vestibular syndrome (EVS), 4.6% (71) with  
29  
30 40 chronic vestibular syndrome (CVS), and 40.9% (628) with no or unclassifiable vestibular syndrome.  
31  
32 41 The three most frequent diagnosis were stroke / minor stroke (10.1%, 155), benign paroxysmal  
33  
34 42 positional vertigo (9.8%, 150) and vestibular neuritis (9.6%, 148). In patients with an AVS 25.4% (77)  
35  
36 43 had a stroke. The cause of the dizziness remained unknown in 45.0% (692) and 18.0% received a  
37  
38 44 false diagnosis. In 662 (43.1%) cases follow-up was available and 58.2% with an initially unknown  
39  
40 45 diagnoses received a final diagnosis. Overall, 69.9% of all 1535 dizzy patients received neuroimaging  
41  
42 46 (MRI 58.2%, CT 11.6%) in the ED.  
43

44 47 **Conclusions:** One fourth of dizzy patients in the ED presented with AVS with a high prevalence (10%)  
45  
46 48 of vestibular strokes. EVS was more frequent, however, the rate of undiagnosed dizzy patients and the  
47  
48 49 number of patients receiving neuroimaging was high. Almost half of them still remained without  
49  
50 50 diagnosis and among those diagnosed were often misclassified. Many unclear cases of vertigo could  
51  
52 51 be diagnostically clarified after a follow-up visit.  
53

54 52

55 53

56 54

57 55

58 56

59 57

60 58

## 57 **Strengths and limitations**

- 58 • This cross-sectional study includes a large number of dizzy patients visiting the emergency  
59 department.
- 60 • We report the frequency of vestibular syndromes based on the international classification of  
61 the Bárány society.
- 62 • For a more accurate classification into vestibular syndromes a prospective longitudinal study  
63 design would be needed
- 64 • We observed a referral bias (tertiary referral center) leading to a higher proportion of  
65 dangerous diagnoses in dizzy patients
- 66 • Since the treating clinician decided whether a follow-up was pursued there might be a  
67 selection bias

68 **Key words:** vestibular syndromes, acute vestibular syndrome, episodic vestibular syndrome,  
69 frequencies, vertigo, dizziness, emergency department, diagnostic errors

## 71 **BACKGROUND**

72 Patients with dizziness presenting in the emergency department (ED) often suffer from accompanying  
73 symptoms such as nausea, vomiting, gait disturbance and motion intolerance, summarized as a  
74 vestibular syndrome.[1] There is no direct link to a specific cause such as a peripheral or central  
75 disorder,[2] however, physicians might narrow down their differential diagnosis by classifying into three  
76 basic categories of vestibular syndromes.[3]: Episodic, acute and chronic vestibular syndrome. Such  
77 classification is based on the time course and duration of symptoms as well as on whether the  
78 symptoms are continuous or repetitive. This means a paradigm shift from classical teaching,[4] which  
79 is focusing on history taking and investigating symptom quality such as vertigo, disequilibrium,  
80 presyncope and non-specific dizziness. Previous investigations proved that description of symptom  
81 quality is imprecise and inaccurate for diagnostic decisions.[5] The classification into different  
82 vestibular syndromes is internationally accepted and was introduced in the recently revised  
83 International Classification of Diseases from the World Health Organization (WHO) (ICD-11 and ICD-  
84 12 code, 2016).[6] This new definition was elaborated by the international and interdisciplinary Bárány  
85 Society. It allows physicians to recognize patterns, to apply different diagnostic tests based on their

1  
2  
3 86 classification and to reduce the number of differential diagnoses; however, the frequency of vestibular  
4  
5 87 syndromes and their underlying diagnosis remains poorly investigated. In addition, there is an  
6  
7 88 expected overlap of timing and symptoms within each syndrome since any acute vestibular syndrome  
8  
9 89 might persist and develop into a chronic disease or might occur repetitively with symptom free  
10  
11 90 intervals.

12  
13 91 We therefore sought to investigate the frequency of vestibular syndromes, to assess the underlying  
14  
15 92 diagnosis stratified by syndromes, the frequency of diagnostic errors comparing the initial with the  
16  
17 93 follow-up visit and to describe the resource consumption in the ED.

## 18 19 20 94 **METHODS**

21  
22 95 In this retrospective cross-sectional study, we used data collected prospectively during screening for  
23  
24 96 the DETECT (Dizziness Evaluation Tool for Emergent Clinical Triage) study.[7–10] We were looking  
25  
26 97 for patients presenting to the ED of the Inselspital Bern (University Hospital and tertiary referral  
27  
28 98 hospital) with an AVS and a suspected stroke diagnosis. Research fellows trained in neurotology  
29  
30 99 prospectively screened and identified dizzy patients from 07/2015 to 08/2020 using either the ED  
31  
32 100 triage software system (chief complaint or a suspected diagnosis) or direct information from the  
33  
34 101 emergency physician. We included all ED patients presenting with dizziness older than 16 years (ED  
35  
36 102 index visit). We use dizziness as an umbrella term throughout the manuscript including the following  
37  
38 103 set of symptoms: vertigo, dizziness, gait or balance unsteadiness, ataxia and syncope or presyncope.  
39  
40 104 We collected data about baseline demographics, medical history, clinical findings, resources used, as  
41  
42 105 well as diagnoses. In a second step, we retrospectively compared data from the index visit in the ED  
43  
44 106 with data collected in patients who received a follow-up examination at our hospital's dizziness clinic  
45  
46 107 within 90 days after presentation to the ED (follow-up visit).

### 47 48 108 **Classification of vestibular syndromes**

49  
50 109 We classified all included patients into 5 categories based on the international classification from the  
51  
52 110 Bárány Society[1] and predefined criteria:[3] 1) Acute, 2) episodic and 3) chronic vestibular syndrome,  
53  
54 111 4) acute imbalance syndrome and 5) patients not classifiable ("unclear"). We defined vestibular  
55  
56 112 syndromes as follows:

57  
58  
59 113 1) *Acute vestibular Syndrome*

1  
2  
3 114 The acute vestibular syndrome (AVS) is defined as a clinical syndrome of acute onset, continuous  
4  
5 115 dizziness lasting day to weeks, and generally including features suggestive of new, ongoing vestibular  
6  
7 116 system dysfunction (e.g., vomiting, nystagmus, severe postural instability).[1] Although this syndrome  
8  
9 117 is characterized by a single, monophasic event due to a one-time disorder, it might be the beginning of  
10  
11 118 a recurrent disease or a progressive illness course. Thus, AVS might overlap with other syndromes  
12  
13 119 explained below or change over time. There are sub classifications of AVS mentioned in the  
14  
15 120 literature[11] such as t-AVS (post-exposure dizziness after trauma or toxic exposure) or s-AVS  
16  
17 121 (spontaneous AVS) including all patients with continuous dizziness at rest. For the sake of simplicity,  
18  
19 122 we classified all these patients under the umbrella term of AVS.

### 21 123 2) *Episodic vestibular syndrome*

22  
23 124 The episodic vestibular syndrome (EVS) is characterized as transient dizziness lasting seconds to  
24  
25 125 hours, rarely days. It is accompanied by a short duration of nausea, nystagmus and sudden falls.[1]  
26  
27 126 EVS can occur repetitively (episodes) caused by an episodic disorder with repeated spells, or as a  
28  
29 127 single event (first manifestation) of a progressive chronic disorder with a transient or recurrent  
30  
31 128 dizziness. There are subtypes of EVS with associated triggers (t-EVS) or without triggers (s-EVS,  
32  
33 129 spontaneous EVS). Diagnoses of s-EVS is mainly based on the patient's history. Patients with t-EVS  
34  
35 130 have often clinical signs such as positional nystagmus after provocation. Both subgroups were  
36  
37 131 included as EVS without separate differentiation.

### 38 132 3) *Chronic vestibular syndrome*

39  
40 133 The chronic vestibular syndrome (CVS) lasts usually months to years and is generally associated with  
41  
42 134 a persistent vestibular system dysfunction (e.g., oscillopsia, nystagmus, gait unsteadiness, falls).

### 44 135 4) *Acute imbalance/dysbalance syndrome*

45  
46 136 Patients with symptoms that did not meet definitions 1-3 and therefore a vestibular syndrome could be  
47  
48 137 excluded, were classified as an acute imbalance syndrome (AIS).[12,13] Patients with dizziness as an  
49  
50 138 isolated symptom and no accompanying symptoms or no nystagmus were therefore classified as  
51  
52 139 "AIS".

### 53 140 5) *Unclear vestibular syndrome*

54  
55 141 If the information in the medical report was not specific enough to decide whether it was a vestibular  
56  
57 142 syndrome or not, they were labeled as "unclear".

58  
59 143 The type of syndromes and diagnoses from the index visit (ED diagnosis) and the follow-up exam  
60  
144 (follow-up or final diagnosis) were analyzed and compared, if available. We only included the main



1  
2  
3 145 diagnosis reasonable for causing dizziness, additional diagnoses were classified as “other diagnoses”.  
4  
5 146 Patients with more than one differential diagnosis causing dizziness were classified as “unknown”.  
6  
7 147 Patients were reclassified regarding the type of vestibular syndrome based on the time course of  
8  
9 148 symptoms and signs. Patients e.g., with symptoms lasting less than 24 hours or with repetitive events  
10  
11 149 were reported or re-classified as EVS. Misclassified EVS patients were often sent home within a few  
12  
13 150 hours after symptom onset. Initially misclassified EVS with persistent symptoms, however, were re-  
14  
15 151 classified as AVS.  
16  
17 152 We calculated the overall rate of diagnostic errors between the initial ED diagnosis and the follow-up  
18  
19 153 diagnosis using the follow-up diagnosis as reference standard. We also reported the change of  
20  
21 154 diagnoses rate stratified by ED diagnoses. The rate of changes of diagnoses at follow-up was  
22  
23 155 calculated as follows:  $100 * (1 - \text{correct diagnoses} / \text{total diagnoses ED})$ . The diagnosis was assumed  
24  
25 156 to be correct if it did not change from the initial to the follow-up diagnosis.

## 27 157 **Statistics**

28  
29  
30 158 We used SPSS (IBM Corp. Released 2020. IBM SPSS Statistics for Windows, Version 27.0. Armonk,  
31  
32 159 NY: IBM Corp) for statistics and descriptive data analysis. We did a subgroup analysis on those  
33  
34 160 patients who received a follow-up examination. Cross tabulations were used to compare results at the  
35  
36 161 ED index visit with the follow-up visit. Cohen’s Kappa was calculated to report the concordance  
37  
38 162 between index visit and follow-up regarding the classification of vestibular syndromes and diagnoses.

## 40 163 **Patient and public involvement**

41  
42  
43 164 Patients or the public were not involved in our research design, conduct, reporting or dissemination  
44  
45 165 plans.

## 47 166 **RESULTS**

### 50 167 **Prevalence of vestibular syndromes and underlying diagnoses**

51  
52 168 We included 1535 Patients aged from 16 to 98 (mean 55.7 years +/-SD 18.6 years) who presented  
53  
54 169 with dizziness as a chief complaint. Our cohort consisted of 745 (48.5%) men and 790 (51.5%)  
55  
56 170 women. The age and gender distribution are shown as a histogram in the additional file 1 (figure S1).  
57  
58 171 Of all patients, 303 presented with AVS (19.7%), 533 with EVS (34.7%), 71 with CVS (4.6%) and 472  
59  
60 172 patients had an AIS (30.8%). In 156 cases (10.2%), the type of vestibular syndrome remained unclear

173 or was not classifiable based on clinical and reported findings. Since several diagnoses could be  
 174 selected, there were more diagnoses than cases.

175 The five most frequent diagnoses including all types of vestibular syndromes were strokes (n=155,  
 176 10.1%), benign paroxysmal positional vertigo (BPPV) (n=150, 9.8%), acute unilateral vestibulopathy  
 177 (n=148, 9.6%), transient ischemic attack (TIA) (n=77, 5.0%) and dysautonomia (n=63, 4.1%). In 692  
 178 cases (45.0%) the diagnosis remained unknown. Table 1 shows the frequency of diagnoses stratified  
 179 by vestibular syndromes.

180 **Table 1:** ED diagnoses stratified by vestibular syndromes

| Diagnose                                                   | total<br>(n=1535) | AVS<br>(n=303) | EVS<br>(n=533) | CVS<br>(n=71) | AIS<br>(n=472) | Unclear<br>(n=156) |
|------------------------------------------------------------|-------------------|----------------|----------------|---------------|----------------|--------------------|
| Stroke / Minor Stroke                                      | 155 (10.10%)      | 77 (25.41%)    | 10 (1.88%)     | 2 (2.82%)     | 61 (12.92%)    | 5                  |
| BPPV                                                       | 150 (9.77%)       | 1 (0.33%)      | 143 (26.83%)   | 0 (0.00%)     | 1 (0.21%)      | 5                  |
| Acute unilateral vestibulopathy (e.g. Vestibular Neuritis) | 148 (9.64%)       | 127 (41.91%)   | 9 (1.69%)      | 2 (2.82%)     | 8 (1.69%)      | 2                  |
| TIA                                                        | 77 (5.02%)        | 8 (2.64%)      | 55 (10.32%)    | 2 (2.82%)     | 9 (1.91%)      | 3                  |
| Dysautonomia                                               | 63 (4.10%)        | 0 (0.00%)      | 14 (2.63%)     | 1 (1.41%)     | 47 (9.96%)     | 1                  |
| Vestibular migraine                                        | 35 (2.28%)        | 1 (0.33%)      | 31 (5.82%)     | 1 (1.41%)     | 1 (0.21%)      | 1                  |
| Menière's disease                                          | 22 (1.43%)        | 1 (0.33%)      | 20 (3.75%)     | 0 (0.00%)     | 0 (0.00%)      | 1                  |
| PPPD                                                       | 22 (1.43%)        | 1 (0.33%)      | 2 (0.38%)      | 9 (12.68%)    | 7 (1.48%)      | 3                  |
| Tumor                                                      | 17 (1.11%)        | 3 (0.99%)      | 1 (0.19%)      | 2 (2.82%)     | 10 (2.12%)     | 1                  |
| Trauma                                                     | 13 (0.85%)        | 0 (0.00%)      | 1 (0.19%)      | 0 (0.00%)     | 9 (1.91%)      | 3                  |
| Medical side effects                                       | 11 (0.72%)        | 0 (0.00%)      | 2 (0.38%)      | 0 (0.00%)     | 8 (1.69%)      | 1                  |
| Heart disease                                              | 10 (0.65%)        | 1 (0.33%)      | 0 (0.00%)      | 0 (0.00%)     | 8 (1.69%)      | 1                  |
| Labyrinthitis                                              | 9 (0.59%)         | 7 (2.31%)      | 1 (0.19%)      | 1 (1.41%)     | 0 (0.00%)      | 0                  |
| Infectious disease                                         | 7 (0.46%)         | 6 (1.98%)      | 0 (0.00%)      | 1 (1.41%)     | 0 (0.00%)      | 0                  |
| Metabolic                                                  | 7 (0.46%)         | 1 (0.33%)      | 0 (0.00%)      | 0 (0.00%)     | 5 (1.06%)      | 1                  |
| Neurodegenerative disease                                  | 5 (0.33%)         | 1 (0.33%)      | 0 (0.00%)      | 0 (0.00%)     | 4 (0.85%)      | 0                  |
| Acoustic neuroma                                           | 4 (0.26%)         | 1 (0.33%)      | 0 (0.00%)      | 2 (2.82%)     | 1 (0.21%)      | 0                  |
| Vestibular Paroxysmia                                      | 1 (0.07%)         | 0 (0.00%)      | 1 (0.19%)      | 0 (0.00%)     | 0 (0.00%)      | 0                  |
| Others                                                     | 110 (7.17%)       | 13 (4.29%)     | 10 (1.88%)     | 8 (11.27%)    | 67 (14.19%)    | 12                 |
| Unknown                                                    | 692 (45.08%)      | 62 (20.46%)    | 239 (44.84%)   | 44 (61.97%)   | 228 (44.31%)   | 119                |
| Total <sup>1)</sup>                                        | 1558              | 311            | 539            | 75            | 474            | 159                |

181 <sup>1)</sup>Since several diagnoses can be selected per case, there are more diagnoses than cases. For each diagnosis  
 182 the corresponding syndrome is listed in the table, so the total number of the syndromes is higher.

183 Abbreviations: AVS (acute vestibular syndrome), EVS (episodic vestibular syndrome), CVS (chronich vestibular  
 184 syndrome), AIS (acute imbalance syndrome), BPPV (benign paroxysmal positional vertigo), TIA (transient  
 185 ischemic attack), PPPD (persistent postural-perceptual dizziness)

186

### 187 Accuracy of syndrome classification

188 662 (43.1%) out of 1535 patients received a follow-up. There was an excellent agreement (Cohen's  
 189 Kappa = 0,909,  $p < 0.001$ ) between the syndrome classification at index visit and follow-up with a  
 190 reported change of the acute vestibular syndrome in 3.2% after the follow-up. Most of the misclassified  
 191 AVS patients were reassessed as EVS. EVS patients, however, were misclassified in 3.6%. Among  
 192 the patients with an AIS on the ED, the re-classification rate was 8.0%, whereas 1 patient was  
 193 subsequently classified as AVS. In the cases that could not be initially classified in the ED, 34.7%  
 194 could be classified as a vestibular syndrome or AIS in the follow-up examination (table 2).

195 **Table 2:** Cross tabulation - vestibular syndrome ED vs. follow-up (n=662)

|    |         | Follow-up |     |     |     |         |       | Change of<br>syndrome<br>[%] |
|----|---------|-----------|-----|-----|-----|---------|-------|------------------------------|
|    |         | AVS       | EVS | CVS | AIS | unclear | total |                              |
| ED | AVS     | 215       | 5   | 0   | 1   | 1       | 222   | 3.15%                        |
|    | EVS     | 5         | 187 | 0   | 2   | 0       | 194   | 3.61%                        |
|    | CVS     | 0         | 0   | 34  | 0   | 0       | 34    | 0.00%                        |
|    | AIS     | 1         | 6   | 3   | 150 | 3       | 163   | 7.98%                        |
|    | unclear | 4         | 6   | 2   | 5   | 32      | 49    | 34.69%                       |
|    | total   | 225       | 204 | 39  | 158 | 36      | 662   |                              |

196

### 197 Diagnostic errors in dizzy patients

198 In this section, we compare the diagnosis at ED with the diagnosis at follow-up (n=662). We report an  
 199 overall change in diagnosis between initial ED assessment and follow-up of 31.4 %. The proportion of  
 200 diagnostic errors (excluding patients with unknown causes) was 18.0%. There was a moderate to low  
 201 agreement between the initial diagnosis (ED diagnosis) and the final diagnosis after the follow-up  
 202 (Cohen's Kappa = 0.609,  $p < 0.001$ ). Often diagnostic errors occurred in patients with dysautonomia  
 203 (33%, 6/9), TIA (30.6%, 15/49), BPPV (28.6%, 8/28), Menière's disease (26.7%, 4/15), stroke / minor  
 204 stroke (13.6%, 18/132) and for acute unilateral vestibulopathy (15.7%, 14/89). Of the cases with an  
 205 initial diagnosis of TIA, the diagnosis was changed during follow-up to "stroke/minor stroke" in seven  
 206 and to "unknown" in four cases (table 3 and additional file 1 table S1). The cause of the dizziness was  
 207 at the time of the ED visit unknown in 37.6%. In 104 out of 662 cases the diagnosis remained unclear  
 208 even after the follow-up exam, however, 58.2% of all unknown cases in the ED received finally a

209 diagnosis and could be clarified (table 4). A special focus was placed on patients with an undiagnosed  
 210 dangerous cause of dizziness (strokes / minor strokes, TIA) leading to potential diagnosis-related  
 211 harm. There were two patients initially diagnosed with BBPV, three with acute unilateral vestibulopathy  
 212 and one case with a medical side effect where the initial diagnosis was changed to TIA or a stroke /  
 213 minor stroke at follow-up. Among patients with no specific diagnoses in the ED (classified as  
 214 unknown/unclear), 14 patients had a stroke and 9 a TIA. In summary, in 29 of the 662 followed-up  
 215 cases (4.4%) a dangerous diagnosis was found at follow-up (potential diagnosis-related harms) which  
 216 was initially not diagnosed in the ED (see additional file 1 table S1, bold cases).

217 **Table 3:** Number of diagnostic errors, change of diagnosis rates, missed dangerous diagnoses and  
 218 mimics.

| ED Diagnoses                                               | Total ED | # of diagnostic errors | Change of diagnosis* | # of missed strokes or TIA | Frequency of undiagnosed underlying diseases (top 3)**                             |
|------------------------------------------------------------|----------|------------------------|----------------------|----------------------------|------------------------------------------------------------------------------------|
| Stroke / Minor stroke                                      | 132      | 18                     | 13.6%                | 5 (TIA)                    | TIA (5)<br>Acute unilateral vestibulopathy (4)<br>Dysautonomia (1)                 |
| Acute unilateral vestibulopathy (e.g. Vestibular Neuritis) | 89       | 14                     | 15.7%                | 3                          | Stroke / Minor stroke (2)<br>Menière (2)<br>Others (2)                             |
| TIA                                                        | 49       | 15                     | 30.6%                | 7 (strokes)                | Stroke / Minor stroke (7)<br>BPPV (1)<br>Metabolic (1)<br>Medical side effects (1) |
| BPPV                                                       | 28       | 8                      | 28.6%                | 2                          | Acute unilateral vestibulopathy (3)<br>Stroke / Minor stroke (2)<br>Others (2)     |
| Menière's disease                                          | 15       | 4                      | 26.7%                | 0                          | Acute unilateral vestibulopathy (3)<br>Labyrinthitis (1)                           |
| Tumor                                                      | 14       | 1                      | 7.1%                 | 0                          | 0                                                                                  |
| Vestibular migraine                                        | 12       | 3                      | 25.0%                | 0                          | Others (2)<br>PPPD (1)                                                             |
| Dysautonomia                                               | 9        | 3                      | 33.3%                | 0                          | Others (2)<br>Heart disease (2)<br>Medical side effects (1)                        |
| Labyrinthitis                                              | 7        | 2                      | 28.6%                | 0                          | Acute unilateral vestibulopathy (1)<br>Acoustic neurinoma (1)                      |
| Infectious disease                                         | 6        | 3                      | 50.0%                | 0                          | Acute unilateral vestibulopathy (3)                                                |
| Heart disease                                              | 5        | 0                      | 0.0%                 | 0                          | 0                                                                                  |
| PPPD                                                       | 5        | 0                      | 0.0%                 | 0                          | 0                                                                                  |

|           |     |     |       |    |                                                                                                           |
|-----------|-----|-----|-------|----|-----------------------------------------------------------------------------------------------------------|
| Others*** | 42  | 4   | 9.5%  | 0  | Dysautonomia (2)<br>BPPV (1)<br>Tumor (1)                                                                 |
| Unknown   | 249 | 145 | 58.2% | 23 | Acute unilateral vestibulopathy (35)<br>Vestibular migraine (22)<br>Stroke / Minor stroke (14)<br>TIA (9) |
| Total     | 662 | 222 | 31.4% | 40 |                                                                                                           |

219 \*Since multiple answers were possible for the diagnoses, the number of diagnostic errors did not  
220 necessarily correspond to the proportion of change of diagnosis. The rate of changes of diagnoses at  
221 follow-up is calculated as follows:  $100 * (1 - \text{correct diagnoses} / \text{total diagnoses ED})$ .

222 \*\*Undiagnosed underlying diseases: This column shows the most frequent changed diagnosis based  
223 on the follow-up exam.

224 \*\*\*Diagnoses less frequent than five are not listed in the table.

225 **Table 4:** Unknown ED diagnoses resolved after follow-up

| Diagnoses at Follow-up                                     | unknown ED diagnoses (n=249) | Frequency |
|------------------------------------------------------------|------------------------------|-----------|
| Acute unilateral vestibulopathy (e.g. Vestibular Neuritis) | 35                           | 14.06%    |
| Others                                                     | 28                           | 11.24%    |
| Vestibular migraine                                        | 22                           | 8.84%     |
| Stroke                                                     | 14                           | 5.62%     |
| TIA                                                        | 9                            | 3.61%     |
| Dysautonomia                                               | 8                            | 3.21%     |
| Menière's disease                                          | 8                            | 3.21%     |
| BPPV                                                       | 6                            | 2.41%     |
| PPPD                                                       | 6                            | 2.41%     |
| Unknown etiology central vestibular syndrome               | 4                            | 1.61%     |
| Metabolic disorders                                        | 3                            | 1.20%     |
| Tumor                                                      | 1                            | 0.40%     |
| Medical side effects                                       | 1                            | 0.40%     |
| Heart disease                                              | 1                            | 0.40%     |
| Labyrinthitis                                              | 1                            | 0.40%     |
| Infectious disease                                         | 1                            | 0.40%     |
| Trauma                                                     | 0                            | 0.00%     |
| Neurodegenerative disease                                  | 0                            | 0.00%     |
| Acoustic neuroma                                           | 0                            | 0.00%     |
| Unknown                                                    | 104                          | 41.77%    |

226

227

228

## 229 ED resource use

230 Overall, 69.9% of all 1535 dizzy patients received neuroimaging at the ED visit (MRI 58.2%, CT  
 231 11.6%). 16.8% of stroke patients underwent a computed tomography (CT), 89.7% an MRI. Patients  
 232 with a BPPV received in 41.3% an MRI and in 8% a CT showing a similar resource use as patients  
 233 with acute unilateral vestibulopathy (48% MRI, 6.8% CT). Table 5 shows details of ED resource use  
 234 stratified by ED diagnoses.

235 **Table 5:** ED Resources stratified by diseases (n=1535)

|                    | Stroke /<br>Minor Stroke | BPPV       | Acute<br>unilateral<br>vestibulopathy | TIA        | Menière's<br>disease | PPPD      | Trauma    |
|--------------------|--------------------------|------------|---------------------------------------|------------|----------------------|-----------|-----------|
| MRI                | 139 (89.7%)              | 62 (41.3%) | 71 (48.0%)                            | 62 (80.5%) | 11 (50.0%)           | 9 (40.9%) | 3 (23.1%) |
| CT                 | 26 (16.8%)               | 12 (8.0%)  | 10 (6.8%)                             | 13 (16.9%) | 0 (0.0%)             | 0 (0.0%)  | 6 (46.2%) |
| Audiology          | 5 (3.2%)                 | 16 (10.7%) | 90 (60.8%)                            | 6 (7.8%)   | 12 (54.5%)           | 1 (4.5%)  | 0 (0.0%)  |
| Caloric            | 8 (5.2%)                 | 26 (17.3%) | 115 (77.7%)                           | 11 (14.3%) | 9 (40.9%)            | 2 (9.1%)  | 0 (0.0%)  |
| vHIT               | 4 (2.6%)                 | 6 (4.0%)   | 41 (27.7%)                            | 3 (3.9%)   | 2 (9.1%)             | 1 (4.5%)  | 0 (0.0%)  |
| Total<br>diagnoses | 155                      | 150        | 148                                   | 77         | 22                   | 22        | 13        |

## 237 DISCUSSION

238 One fifth to one third of dizzy patients presented symptoms consisting of AVS or EVS. Another third of  
 239 patients were not classifiable based on current criteria. Patients with CVS were noticeably less likely to  
 240 present to the ED. In more than one third of the cases, which received a follow-up, the diagnosis was  
 241 changed. Diagnostic uncertainty could be resolved at the follow-up visit in more than half of patients  
 242 with unknown or unclear diagnosis. We found that a great number of imaging studies were ordered for  
 243 dizziness workup.

### 244 Prevalence of vestibular syndromes and underlying diagnoses

245 The reported prevalence of AVS in the literature ranges from 10% to 22%, [2, 14] which matches our  
 246 findings in the ED (20%). Our reported prevalence in the ED is not generalizable to other settings such  
 247 as outpatient clinics, where the proportion of chronic vestibular syndromes might predominate. Violent  
 248 vertigo attacks in patients with recurrent vertigo (EVS) might prompt patients to visit the ED rather than  
 249 an outpatient clinic resulting in a high prevalence of 35%. The most common ED diagnoses in the total

1  
2  
3 250 ED population were stroke / minor stroke, BPPV, and acute unilateral vestibulopathy, which is in  
4  
5 251 agreement with other reports.[15,16] The ED prevalence of strokes / minor stroke was 10% in our  
6  
7 252 study, which is considerably higher than previously described (~4% cerebrovascular).[15,17] The  
8  
9 253 reported prevalence, however is consistent with our previous, retrospective study from the same  
10  
11 254 center with another sample.[18] In patients with AVS, however, the prevalence of stroke is significantly  
12  
13 255 higher at 25.4% probably due to a referral bias of a tertiary care center including the largest stroke  
14  
15 256 center of the country. Despite extensive investigations reflected in the resources used, almost half of  
16  
17 257 the cases remained undiagnosed, which is higher compared to 22% in another cross-sectional  
18  
19 258 study.[15] One reason for the higher number of “unknown” causes could be due to the applied  
20  
21 259 classification rules classifying patients with multiple differential diagnoses as “unknown”.

### 22 23 260 **Accuracy of syndrome classification**

24  
25 261 Overall, the accuracy of the classification into three different vestibular syndromes was high. In one-  
26  
27 262 tenth of the cases, the documented history was not sufficient to decide whether the patient had a  
28  
29 263 vestibular syndrome. Possible reasons for this were a lack of documentation or an inappropriate  
30  
31 264 history taking. In the group with a follow-up examination, more than one third of the unclear ED cases  
32  
33 265 could be assigned to a vestibular syndrome or a vestibular syndrome could be excluded based on the  
34  
35 266 extended history of the follow-up report. This finding emphasizes the importance of taking a targeted  
36  
37 267 history (asking timing and triggers)[11,19] and the need of a follow-up to better assess the time course  
38  
39 268 of dizziness. Digital decision support tools might assist physicians to take a structured and complete  
40  
41 269 history. It is therefore important to improve digital competencies in the future.[20] Overall, there were  
42  
43 270 only a few misclassifications of vestibular syndromes in the ED. Misclassified EVS patients presenting  
44  
45 271 initially as AVS had a short duration of symptoms which abated after the ED discharge. Diagnoses  
46  
47 272 with EVS being at risk for misclassification as AVS included vestibular migraine, Menière’s disease  
48  
49 273 and TIA. Main reason for misclassification was the first time occurrence of episodic dizziness with no  
50  
51 274 previous history of dizzy episodes as mandated by international diagnostic criteria.[21,22] We also  
52  
53 275 found misclassifications of AVS as EVS in patients with cerebral strokes, vestibular neuritis and with  
54  
55 276 dysautonomia. Infarctions in the cerebellum (mainly PICA territory) can mimic positional vertigo,  
56  
57 277 known as pseudo-BPPV.[23] Finally, each patient with an AVS suffers from motion intolerance, which  
58  
59 278 can be misinterpreted as positional vertigo.

60 279

## 280 **Diagnostic errors in dizziness patients**

281 The terminology and definitions regarding diagnostic errors is under debate.[24] It can be used as an  
282 umbrella term including preventable, reducible or unavoidable diagnostic errors.[25] Our data,  
283 however, were not sufficient to assess the underlying diagnostic processes and workups leading to a  
284 specific diagnosis. We avoided, therefore, terms such as 'misdiagnosis', because such conclusions  
285 might be perceived as implicating errors in the diagnostic process, which we did not investigate. A sub  
286 classification into diagnostic process failure or diagnostic label failure was not possible based on our  
287 design. Diagnosing dizziness is a challenge for ED physicians and diagnostic errors are unavoidable  
288 even for experts in the field (following an optimal diagnostic process) due to the nature and complexity  
289 of the underlying diseases.[26] Thus, we aim to increase awareness about an unresolved issue  
290 regarding diagnostic accuracy in dizzy patients visiting the ED. In a German retrospective study, 124  
291 of 475 dizziness patients (26%) received follow-up.[16] This number is lower than the number of  
292 patients followed up in our study (43.1%). This selection bias has to be kept in mind, interpreting the  
293 presented results. The decision to schedule patients for follow-up could reflect an intimate uncertainty  
294 with the diagnosis or be an expression of increased caution of the treating physician with that  
295 particular patient. In another study from our department on diagnostic errors the "feeling of atypical  
296 presentation" was the only predictor of a diagnostic error.[27] This "feeling of atypical presentation" is  
297 likely to prompt follow-up visits leading to a selection bias in our follow-up patients. In the German  
298 study, ED diagnosis was corrected in 43%.[16] We observed a lower rate of diagnostic errors in our  
299 study (31%). Of the benign ED diagnoses, 6% (n= 7 of 124) were finally diagnosed with a dangerous  
300 diagnosis during follow-up in the German study[16] compared to 4% (n= 29 of 662) in our study.  
301 Patients in our study, however, received significantly more often MRIs in the ED (58% MRI vs. 18%).  
302 This might contribute to the lower number of missed dangerous diagnoses (diagnosis related harm).  
303 Despite extensive ED workups (including neuroimaging), four patients were still diagnosed as  
304 vestibular neuritis or BPPV and finally had a stroke (Pseudo-neuritis or Pseudo-BPPV) without any  
305 focal neurological signs. Recent literature confirms that 50% of patients with vestibular strokes might  
306 have isolated dizziness.[28,29] The MRI misses 10-20% of strokes presenting with AVS during the first  
307 24-48h after onset.[30] Up to 50% false negative MRIs are reported for smaller vestibular strokes  
308 (<1cm).[28] The 'HINTS' examination can be a possible solution for this dilemma. This three-step  
309 bedside exam, introduced in 2009,[31] includes the head impulse test, nystagmus test and test of  
310 skew and is more sensitive for stroke than early MRI. The application of a portable device using an



1  
2  
3 311 eye-tracker and head accelerometers allows a quantitative and accurate stroke prediction in patients  
4  
5 312 with AVS.[7,32–34] The comparison between diagnoses at the index (ED) and the follow-up visit  
6  
7 313 shows that in many cases a definite diagnosis can only be made over time. This is often due to  
8  
9 314 diagnostic criteria that require repetitive episodes of vertigo.[21,22] Some patients are symptom-free in  
10  
11 315 the interval between episodes of dizziness or at the time of the emergency visit.

### 13 316 **ED resource use**

16 317 Altogether, neuroimaging was ordered in 70% of cases, of which 83% were MRIs. This high  
17  
18 318 percentage may be due to the 7/24-availability of MR imaging in our university hospital. We observed  
19  
20 319 that a large number of MRI was performed in patients who finally received a peripheral vestibular  
21  
22 320 diagnosis such as BPPV, Menière's disease or an acute unilateral vestibulopathy. The diagnosis of  
23  
24 321 vestibular disorders can often be established by targeted history taking and clinical examination. There  
25  
26 322 is no need for neuroimaging in clinical diagnoses such as BPPV with a typical history and typical  
27  
28 323 positional nystagmus elicited by diagnostic maneuvers.[35] Atypical findings (e.g. in BPPV with  
29  
30 324 apogeotropic nystagmus) or a diagnosis of exclusion (e.g. in Menière's disease) might still justify  
31  
32 325 neuroimaging (MRI) in the ED. CT scans, however, are only suggested in patients with suspected  
33  
34 326 trauma, hemorrhage or in patients with a contraindication for a MRI. The current clinical approach  
35  
36 327 leads to an unnecessary overuse of computed tomography and magnetic resonance imaging and  
37  
38 328 increases costs exceeding billions of dollars in the US alone.[36] Dizzy patients have longer average  
39  
40 329 ED stays than patients without dizziness because they undergo more testing.[15] The rate of  
41  
42 330 undiagnosed or misclassified patients remains high, resulting in higher costs and considerable waste  
43  
44 331 of resources in the ED in Switzerland.[36–38]

### 45 332 **Strengths and limitations**

48 333 The strengths of the study are the large number of included and screened cases and the  
49  
50 334 determination of vestibular syndromes based on history and follow-up assessments. A more accurate  
51  
52 335 classification into the vestibular syndromes would need, however, a prospective longitudinal study  
53  
54 336 design. We also observed a referral bias (tertiary referral center) leading to a higher proportion of  
55  
56 337 dangerous diagnoses in dizzy patients. In addition, the treating clinician decided whether a follow-up  
57  
58 338 was pursued, which may have caused a selection bias.

### 59 339 **Implications for clinicians**

1  
2  
3 340 Our study confirms that about a fifth of patients suffers from AVS. The high prevalence of strokes in  
4  
5 341 patients with continuous dizziness (25%), the high number of undiagnosed or misclassified cases  
6  
7 342 should increase the overall awareness regarding diagnostic errors and stroke mimics. Consequently,  
8  
9 343 we suggest a three-stage diagnostic test process for patients presenting with dizziness in the ED. This  
10  
11 344 approach does intend increase diagnostic accuracy and to reduce neuroimaging in the acute stage.  
12  
13 345 We suggest, therefore,

14  
15 346 1) A more sensitive screening (triage) test including a classification into vestibular syndromes  
16  
17 347 (targeted history) and recording of spontaneous nystagmus, 2) a targeted clinical exam with either  
18  
19 348 "HINTS" test[31] in AVS patients or "Dix-Hallpike" examination[35] in EVS patients with triggers and 3)  
20  
21 349 a dedicated neuroimaging (e.g. acute and delayed MRI) in patients with suspected central causes of  
22  
23 350 vertigo.

24  
25 351 In patients with EVS and absence of triggers (suspected Menière's disease or vestibular migraine) we  
26  
27 352 alternatively suggest as a second stage caloric testing and audiometry in a planned follow-up and as a  
28  
29 353 third stage a delayed neuroimaging (diagnosis of exclusion). Patients without any nystagmus  
30  
31 354 (spontaneous or after provocation) might need a more extended neurological exam such as BE-  
32  
33 355 FAST.[39] Patients with inconclusive or atypical findings might need further assessment for risk factors  
34  
35 356 (e.g. ABCD2 score)[40] in order to minimize the risk for missed minor strokes and to prevent future  
36  
37 357 harmful events. We further recommend a low threshold for organizing a follow-up appointment in dizzy  
38  
39 358 patients since the symptoms and the diagnosis might change over time. This study paves the way for  
40  
41 359 future studies providing epidemiological data including the expected prevalence for each type of  
42  
43 360 vestibular syndrome.

## 44 45 361 **CONCLUSION**

46  
47  
48 362 One fifth of dizzy patients in the ED presented with AVS with a high prevalence (10%) of vestibular  
49  
50 363 strokes. Episodic vertigo (EVS) was more frequent, however, the rate of undiagnosed dizzy patients  
51  
52 364 and the number of patients receiving neuroimaging was high. Almost half of them still remained  
53  
54 365 without diagnosis and among those diagnosed were often misclassified. Many unclear cases of vertigo  
55  
56 366 could be diagnostically clarified after a follow-up visit.

57 367  
58  
59 368  
60  
369

1  
2  
3 370 **ABBREVIATIONS**  
4

5  
6 371 ED emergency department  
7  
8 372 AVS acute vestibular syndrome  
9  
10 373 EVS episodic vestibular syndrome  
11  
12 374 AIS acute imbalance syndrome  
13  
14 375 CVS chronic vestibular syndrome  
15  
16 376 TIA transient ischemic attack  
17  
18 377 BPPV benign paroxysmal positional vertigo  
19  
20 378 AUVP acute unilateral vestibulopathy  
21  
22 379 MRI magnetic resonance imaging  
23  
24 380 CT computer tomography  
25  
26 381 vHIT video head impulse test  
27  
28 382 PPPD persistent postural-perceptual dizziness  
29  
30 383 VOG video-oculography  
31

32

33 385 **DECLARATIONS**

34 386 **Ethics approval and consent to participate:** The study was approved by the local ethics committee  
35  
36 387 (KEK Bern, #2021-00918). Given the retrospective nature of the study, informed consent was provided  
37  
38 388 through a hospital-wide general consent. Patients who withdrew consent for evaluation of their medical  
39  
40 389 data were excluded in accordance with legal requirements.

41  
42 390 **Consent for publication:** Not applicable

43  
44 391 **Availability of data and materials:** The datasets used and/or analyzed during the current study are  
45  
46 392 available from the corresponding author on reasonable request.

47  
48 393 **Competing interests:** None of the investigators has any relevant financial interests, activities,  
49  
50 394 relationships, or affiliations that represent a relevant financial conflict of interest with respect to the  
51  
52 395 conduct or analysis of this study.

53  
54  
55 396 **Funding:** This study was supported by the Swiss National Science Foundation #320030\_173081.

56  
57 397 **Authors' contributions:** AK, EZ, FN and LC collected and processed the data. GM and LC conceived  
58  
59 398 the study, analyzed and interpreted the data and wrote the draft. MC, TS, WH and SJ were involved in  
60

1  
2  
3 399 the interpretation of the data and in the review. All authors discussed the results, commented on the  
4  
5 400 manuscript, and read and approved the final version.  
6

7 401 **Acknowledgements:** We thank Prof. Dr. Wolf Hautz for his valuable suggestions and review of the  
8  
9 402 manuscript.  
10  
11  
12  
13  
14  
15  
16  
17  
18  
19  
20  
21  
22  
23  
24  
25  
26  
27  
28  
29  
30  
31  
32  
33  
34  
35  
36  
37  
38  
39  
40  
41  
42  
43  
44  
45  
46  
47  
48  
49  
50  
51  
52  
53  
54  
55  
56  
57  
58  
59  
60

For peer review only

## 403 REFERENCES

- 404 1 Bisdorff AR, Staab JP, Newman-Toker DE. Overview of the International Classification of  
405 Vestibular Disorders. *Neurol Clin* 2015;**33**:541–50. doi:10.1016/j.ncl.2015.04.010
- 406 2 Tarnutzer AA, Berkowitz AL, Robinson KA, *et al*. Does my dizzy patient have a stroke? A  
407 systematic review of bedside diagnosis in acute vestibular syndrome. *CMAJ Can Med Assoc J J*  
408 *Assoc Medicale Can* 2011;**183**:E571-592. doi:10.1503/cmaj.100174
- 409 3 Bisdorff A. Chapter 6 - Vestibular symptoms and history taking. In: Furman JM, Lempert T, eds.  
410 *Handbook of Clinical Neurology*. Elsevier 2016. 83–90. doi:10.1016/B978-0-444-63437-5.00006-6
- 411 4 Edlow JA. Diagnosing dizziness: we are teaching the wrong paradigm! *Acad Emerg Med Off J*  
412 *Soc Acad Emerg Med* 2013;**20**:1064–6. doi:10.1111/acem.12234
- 413 5 Newman-Toker DE, Cannon LM, Stofferahn ME, *et al*. Imprecision in Patient Reports of Dizziness  
414 Symptom Quality: A Cross-sectional Study Conducted in an Acute Care Setting. *Mayo Clin Proc*  
415 2007;**82**:1329–40. doi:10.4065/82.11.1329
- 416 6 ICD-11 for Mortality and Morbidity Statistics. [https://icd.who.int/dev11/l-](https://icd.who.int/dev11/l-m/en#/http%3a%2f%2fid.who.int%2fid%2fentity%2f1462112221)  
417 [m/en#/http%3a%2f%2fid.who.int%2fid%2fentity%2f1462112221](https://icd.who.int/dev11/l-m/en#/http%3a%2f%2fid.who.int%2fid%2fentity%2f1462112221) (accessed 27 Jan 2022).
- 418 7 Mantokoudis G, Wyss T, Zamaro E, *et al*. Stroke Prediction Based on the Spontaneous  
419 Nystagmus Suppression Test in Dizzy Patients. *Neurology* 2021;**97**:e42–51.  
420 doi:10.1212/WNL.00000000000012176
- 421 8 Mantokoudis G, Korda A, Zee DS, *et al*. Bruns' nystagmus revisited: A sign of stroke in patients  
422 with the acute vestibular syndrome. *Eur J Neurol* 2021;**28**:2971–9. doi:10.1111/ene.14997
- 423 9 Morrison M, Korda A, Zamaro E, *et al*. Paradigm shift in acute dizziness: is caloric testing  
424 obsolete? *J Neurol* 2022;**269**:853–60. doi:10.1007/s00415-021-10667-7
- 425 10 Korda A, Zamaro E, Wagner F, *et al*. Acute vestibular syndrome: is skew deviation a central sign?  
426 *J Neurol* Published Online First: 9 July 2021. doi:10.1007/s00415-021-10692-6
- 427 11 Newman-Toker DE, Edlow JA. TiTrATE: A Novel, Evidence-Based Approach to Diagnosing Acute  
428 Dizziness and Vertigo. *Neurol Clin* 2015;**33**:577–99, viii. doi:10.1016/j.ncl.2015.04.011
- 429 12 Machner B, Choi JH, Trillenber P, *et al*. Risk of acute brain lesions in dizzy patients presenting to  
430 the emergency room: who needs imaging and who does not? *J Neurol* 2020;**267**:126–35.  
431 doi:10.1007/s00415-020-09909-x
- 432 13 Zwergal A, Möhwald K, Dieterich M. Schwindel in der Notaufnahme. *Nervenarzt* 2017;**88**:587–96.  
433 doi:10.1007/s00115-017-0342-y
- 434 14 Ljunggren M, Persson J, Salzer J. Dizziness and the Acute Vestibular Syndrome at the  
435 Emergency Department: A Population-Based Descriptive Study. *Eur Neurol* 2018;**79**:5–12.  
436 doi:10.1159/000481982
- 437 15 Newman-Toker DE, Hsieh Y-H, Camargo CA, *et al*. Spectrum of dizziness visits to US emergency  
438 departments: cross-sectional analysis from a nationally representative sample. *Mayo Clin Proc*  
439 2008;**83**:765–75. doi:10.4065/83.7.765
- 440 16 Royl G, Ploner CJ, Leithner C. Dizziness in the Emergency Room: Diagnoses and Misdiagnoses.  
441 *Eur Neurol* 2011;**66**:256–63. doi:10.1159/000331046
- 442 17 Kerber KA, Meurer WJ, West BT, *et al*. Dizziness presentations in U.S. emergency departments,  
443 1995-2004. *Acad Emerg Med Off J Soc Acad Emerg Med* 2008;**15**:744–50. doi:10.1111/j.1553-  
444 2712.2008.00189.x

- 1  
2  
3 445 18 Goeldlin M, Gaschen J, Kammer C, *et al*. Frequency, aetiology, and impact of vestibular  
4 446 symptoms in the emergency department: a neglected red flag. *J Neurol* 2019;**266**:3076–86.  
5 447 doi:10.1007/s00415-019-09525-4  
6  
7 448 19 Edlow JA, Newman-Toker D. Using the Physical Examination to Diagnose Patients with Acute  
8 449 Dizziness and Vertigo. *J Emerg Med* 2016;**50**:617–28. doi:10.1016/j.jemermed.2015.10.040  
9  
10 450 20 Hautz SC, Hoffmann M, Exadaktylos AK, *et al*. Digital competencies in medical education in  
11 451 Switzerland: an overview of the current situation. *GMS J Med Educ* 2020;**37**:Doc62.  
12 452 doi:10.3205/zma001355  
13  
14 453 21 Lempert T, Olesen J, Furman J, *et al*. Vestibular migraine: Diagnostic criteria. *J Vestib Res*  
15 454 2012;**22**:167–72. doi:10.3233/VES-2012-0453  
16  
17 455 22 Lopez-Escamez JA, Carey J, Chung W-H, *et al*. Diagnostic criteria for Meniere's disease.  
18 456 *J Vestib Res* 2015;**25**:1–7. doi:10.3233/VES-150549  
19  
20 457 23 Volgger V, Gürkov R. Acute vestibular syndrome in cerebellar stroke. *HNO* 2017;**65**:149–52.  
21 458 doi:10.1007/s00106-016-0315-7  
22  
23 459 24 Hautz WE. When I say... diagnostic error. *Med Educ* 2018;**52**:896–7. doi:10.1111/medu.13602  
24  
25 460 25 Newman-Toker DE. A unified conceptual model for diagnostic errors: underdiagnosis,  
26 461 overdiagnosis, and misdiagnosis. *Diagn Berl Ger* 2014;**1**:43–8. doi:10.1515/dx-2013-0027  
27  
28 462 26 Kerber KA, Newman-Toker DE. Misdiagnosing Dizzy Patients: Common Pitfalls in Clinical  
29 463 Practice. *Neurol Clin* 2015;**33**:565–75. doi:10.1016/j.ncl.2015.04.009  
30  
31 464 27 Hautz WE, Kämmer JE, Hautz SC, *et al*. Diagnostic error increases mortality and length of  
32 465 hospital stay in patients presenting through the emergency room. *Scand J Trauma Resusc Emerg*  
33 466 *Med* 2019;**27**:54. doi:10.1186/s13049-019-0629-z  
34  
35 467 28 Saber Tehrani AS, Kattah JC, Mantokoudis G, *et al*. Small strokes causing severe vertigo.  
36 468 *Neurology* 2014;**83**:169–73. doi:10.1212/WNL.0000000000000573  
37  
38 469 29 Tarnutzer AA, Lee S-H, Robinson KA, *et al*. ED misdiagnosis of cerebrovascular events in the era  
39 470 of modern neuroimaging. *Neurology* 2017;**88**:1468–77. doi:10.1212/WNL.0000000000003814  
40  
41 471 30 Edlow JA, Gurley KL, Newman-Toker DE. A New Diagnostic Approach to the Adult Patient with  
42 472 Acute Dizziness. *J Emerg Med* 2018;**54**:469–83. doi:10.1016/j.jemermed.2017.12.024  
43  
44 473 31 Kattah Jorge C., Talkad Arun V., Wang David Z., *et al*. HINTS to Diagnose Stroke in the Acute  
45 474 Vestibular Syndrome. *Stroke* 2009;**40**:3504–10. doi:10.1161/STROKEAHA.109.551234  
46  
47 475 32 Mantokoudis G, Saber Tehrani AS, Wozniak A, *et al*. VOR Gain by Head Impulse Video-  
48 476 Oculography Differentiates Acute Vestibular Neuritis from Stroke. *Otol Neurotol* 2015;**36**:457–65.  
49 477 doi:10.1097/MAO.0000000000000638  
50  
51 478 33 Newman-Toker DE, Saber Tehrani AS, Mantokoudis G, *et al*. Quantitative Video-Oculography to  
52 479 Help Diagnose Stroke in Acute Vertigo and Dizziness. *Stroke* 2013;**44**:1158–61.  
53 480 doi:10.1161/STROKEAHA.111.000033  
54  
55 481 34 Mantokoudis G, Otero-Millan J, Gold DR. Current concepts in acute vestibular syndrome and  
56 482 video-oculography. *Curr Opin Neurol* 2022;**35**:75–83. doi:10.1097/WCO.0000000000001017  
57  
58 483 35 von Brevern M, Bertholon P, Brandt T, *et al*. Benign paroxysmal positional vertigo: Diagnostic  
59 484 criteria. *J Vestib Res* 2015;**25**:105–17. doi:10.3233/VES-150553  
60  
61 485 36 Müller M, Goeldlin MB, Gaschen J, *et al*. Characteristics and resource needs in patients with  
62 486 vestibular symptoms: a comparison of patients with symptoms of unknown versus determined  
63 487 origin. *BMC Emerg Med* 2020;**20**:70. doi:10.1186/s12873-020-00361-8

- 1  
2  
3 488 37 Hautz WE, Sauter TC, Hautz SC, *et al.* What determines diagnostic resource consumption in  
4 489 emergency medicine: patients, physicians or context? *Emerg Med J EMJ* 2020;**37**:546–51.  
5 490 doi:10.1136/emered-2019-209022  
6  
7 491 38 Comolli L, Goeldlin M, Gaschen J, *et al.* Schwindelerkrankungen in einem tertiären HNO-  
8 492 Notfallzentrum. *HNO* 2020;**68**:763–72. doi:10.1007/s00106-020-00857-6  
9  
10 493 39 Aroor S, Singh R, Goldstein LB. BE-FAST (Balance, Eyes, Face, Arm, Speech, Time). *Stroke*  
11 494 2017;**48**:479–81. doi:10.1161/STROKEAHA.116.015169  
12  
13 495 40 Newman-Toker DE, Kerber KA, Hsieh Y-H, *et al.* HINTS Outperforms ABCD2 to Screen for Stroke  
14 496 in Acute Continuous Vertigo and Dizziness. *Acad Emerg Med* 2013;**20**:986–96.  
15 497 doi:10.1111/acem.12223

16 498  
17  
18  
19  
20  
21  
22  
23  
24  
25  
26  
27  
28  
29  
30  
31  
32  
33  
34  
35  
36  
37  
38  
39  
40  
41  
42  
43  
44  
45  
46  
47  
48  
49  
50  
51  
52  
53  
54  
55  
56  
57  
58  
59  
60

For peer review only

Vestibular syndromes, diagnosis and diagnostic errors in dizzy patients presenting to the emergency department. (Comolli et al.)

APPENDIX

Figure S1

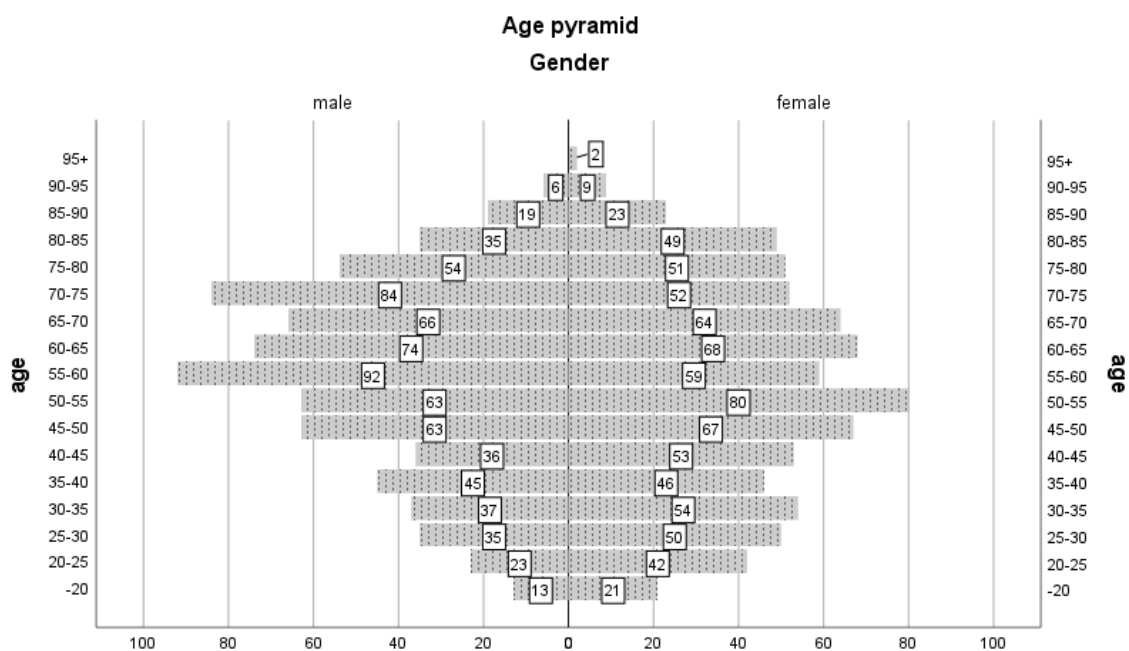

review only



Frequencies of vestibular syndromes, diagnosis and misdiagnosis rates in a tertiary emergency department (Comolli et al.)

**Table S1: Cross table diagnoses emergency department (ED) vs. Follow-up**

Bold cases represent the 29/662 (4.4%) cases where a dangerous diagnosis was found during follow-up but not during ED workup

|                                               | Diagnoses follow up   |      |                                               |          |              |                     |                   |      |       |        |                      |               |               |                    |                     |                           |                  |        |         |                                              | Change of diagnoses at follow-up <sup>2)</sup> |                                  |
|-----------------------------------------------|-----------------------|------|-----------------------------------------------|----------|--------------|---------------------|-------------------|------|-------|--------|----------------------|---------------|---------------|--------------------|---------------------|---------------------------|------------------|--------|---------|----------------------------------------------|------------------------------------------------|----------------------------------|
|                                               | Stroke / Minor Stroke | BPPV | Vestibular Deficit (e.g. Vestibular Neuritis) | TIA      | Dysautonomia | Vestibular migraine | Menière's disease | PPPD | Tumor | Trauma | Medical side effects | Heart disease | Labyrinthitis | Infectious disease | Metabolic disorders | Neurodegenerative disease | Acoustic neuroma | Others | unknown | unknown etiology central vestibular syndrome |                                                | Total Diagnoses ED <sup>1)</sup> |
| Stroke / Minor Stroke                         | 114                   | 0    | 4                                             | 5        | 1            | 0                   | 0                 | 0    | 0     | 0      | 0                    | 0             | 0             | 0                  | 0                   | 0                         | 0                | 1      | 4       | 3                                            | 132                                            | 13.6%                            |
| BPPV                                          | <b>2</b>              | 20   | 3                                             | 0        | 0            | 0                   | 0                 | 0    | 0     | 0      | 0                    | 0             | 1             | 0                  | 0                   | 0                         | 0                | 2      | 2       | 0                                            | 28                                             | 28.6%                            |
| Vestibular Deficit (e.g. Vestibular Neuritis) | <b>2</b>              | 0    | 75                                            | <b>1</b> | 0            | 1                   | 2                 | 0    | 0     | 0      | 0                    | 0             | 1             | 0                  | 0                   | 1                         | 1                | 2      | 6       | 0                                            | 89                                             | 15.7%                            |
| TIA                                           | 7                     | 1    | 0                                             | 34       | 0            | 0                   | 0                 | 0    | 0     | 0      | 1                    | 0             | 0             | 0                  | 1                   | 0                         | 0                | 0      | 4       | 1                                            | 49                                             | 30.6%                            |
| Dysautonomia                                  | 0                     | 0    | 0                                             | 0        | 6            | 0                   | 0                 | 0    | 0     | 0      | 1                    | 2             | 0             | 0                  | 0                   | 0                         | 0                | 2      | 0       | 0                                            | 9                                              | 33.3%                            |
| Vestibular migraine                           | 0                     | 0    | 0                                             | 0        | 0            | 9                   | 0                 | 1    | 0     | 0      | 0                    | 0             | 0             | 0                  | 0                   | 0                         | 0                | 2      | 1       | 0                                            | 12                                             | 25.0%                            |
| Menière's disease                             | 0                     | 0    | 3                                             | 0        | 0            | 0                   | 11                | 0    | 0     | 0      | 0                    | 0             | 1             | 0                  | 0                   | 0                         | 0                | 1      | 0       | 0                                            | 15                                             | 26.7%                            |
| PPPD                                          | 0                     | 0    | 0                                             | 0        | 0            | 1                   | 0                 | 5    | 0     | 0      | 0                    | 0             | 0             | 0                  | 0                   | 0                         | 0                | 0      | 0       | 0                                            | 5                                              | 0.0%                             |
| Tumor                                         | 0                     | 0    | 0                                             | 0        | 0            | 0                   | 0                 | 0    | 13    | 0      | 0                    | 0             | 0             | 0                  | 0                   | 0                         | 0                | 0      | 1       | 0                                            | 14                                             | 7.1%                             |
| Trauma                                        | 0                     | 0    | 0                                             | 0        | 0            | 0                   | 0                 | 0    | 0     | 3      | 0                    | 0             | 0             | 0                  | 0                   | 0                         | 0                | 0      | 0       | 0                                            | 3                                              | 0.0%                             |
| Medical side effects                          | <b>1</b>              | 0    | 0                                             | 0        | 0            | 0                   | 0                 | 0    | 0     | 0      | 2                    | 0             | 0             | 0                  | 0                   | 0                         | 0                | 0      | 0       | 0                                            | 3                                              | 33.3%                            |
| Heart disease                                 | 0                     | 0    | 0                                             | 0        | 0            | 0                   | 0                 | 0    | 0     | 0      | 0                    | 5             | 0             | 0                  | 0                   | 0                         | 0                | 0      | 0       | 0                                            | 5                                              | 0.0%                             |
| Labyrinthitis                                 | 0                     | 0    | 1                                             | 0        | 0            | 0                   | 0                 | 0    | 0     | 0      | 0                    | 0             | 5             | 3                  | 0                   | 0                         | 1                | 0      | 0       | 0                                            | 7                                              | 28.6%                            |
| Infectious disease                            | 0                     | 0    | 3                                             | 0        | 0            | 0                   | 0                 | 0    | 0     | 0      | 0                    | 0             | 1             | 3                  | 0                   | 0                         | 0                | 0      | 0       | 0                                            | 6                                              | 50.0%                            |
| Metabolic disorders                           | 0                     | 0    | 0                                             | 0        | 0            | 0                   | 0                 | 0    | 0     | 0      | 0                    | 0             | 0             | 1                  | 0                   | 0                         | 0                | 0      | 0       | 0                                            | 1                                              | 0.0%                             |
| Neurodegenerative disease                     | 0                     | 0    | 0                                             | 0        | 0            | 0                   | 0                 | 0    | 0     | 0      | 0                    | 0             | 0             | 0                  | 2                   | 0                         | 1                | 0      | 0       | 0                                            | 3                                              | 33.3%                            |
| Acoustic neuroma                              | 0                     | 0    | 0                                             | 0        | 0            | 0                   | 0                 | 0    | 0     | 0      | 0                    | 0             | 1             | 0                  | 0                   | 0                         | 4                | 0      | 0       | 0                                            | 4                                              | 0.0%                             |
| Others                                        | 0                     | 1    | 0                                             | 0        | 2            | 0                   | 0                 | 0    | 1     | 0      | 0                    | 0             | 0             | 0                  | 0                   | 0                         | 0                | 38     | 1       | 0                                            | 42                                             | 9.5%                             |
| unknown                                       | <b>14</b>             | 6    | 35                                            | <b>9</b> | 8            | 22                  | 8                 | 6    | 1     | 0      | 1                    | 1             | 1             | 1                  | 3                   | 0                         | 0                | 28     | 104     | 4                                            | 249                                            | 58.2%                            |
| Total Diagnoses Follow up <sup>1)</sup>       | 138                   | 28   | 122                                           | 49       | 17           | 32                  | 21                | 11   | 15    | 3      | 4                    | 8             | 9             | 5                  | 5                   | 3                         | 5                | 73     | 122     | 8                                            | 662                                            |                                  |

<sup>1)</sup>The fields "total" refer to the number of the corresponding diagnosis. Since several diagnoses are possible, the columns and rows do not add up.

<sup>2)</sup> The rate of changes of diagnoses at follow-up is calculated as follows:  $100 * (1 - \text{correct diagnoses (grey fields)} / \text{total diagnoses ED})$

BPPV = benign paroxysmal positional vertigo; TIA= transient ischemic attack; PPPD = persistent postural-perceptual dizziness

**STROBE 2007 (v4) Statement—Checklist of items that should be included in reports of *cohort studies***

| Section/Topic                | Item # | Recommendation                                                                                                                                                                       | Reported on page # |
|------------------------------|--------|--------------------------------------------------------------------------------------------------------------------------------------------------------------------------------------|--------------------|
| Title and abstract           | 1      | (a) Indicate the study's design with a commonly used term in the title or the abstract                                                                                               | 2                  |
|                              |        | (b) Provide in the abstract an informative and balanced summary of what was done and what was found                                                                                  | 2                  |
| <b>Introduction</b>          |        |                                                                                                                                                                                      |                    |
| Background/rationale         | 2      | Explain the scientific background and rationale for the investigation being reported                                                                                                 | 3/4                |
| Objectives                   | 3      | State specific objectives, including any prespecified hypotheses                                                                                                                     | 4                  |
| <b>Methods</b>               |        |                                                                                                                                                                                      |                    |
| Study design                 | 4      | Present key elements of study design early in the paper                                                                                                                              | 4                  |
| Setting                      | 5      | Describe the setting, locations, and relevant dates, including periods of recruitment, exposure, follow-up, and data collection                                                      | 4                  |
| Participants                 | 6      | (a) Give the eligibility criteria, and the sources and methods of selection of participants. Describe methods of follow-up                                                           | 4                  |
|                              |        | (b) For matched studies, give matching criteria and number of exposed and unexposed                                                                                                  | NA                 |
| Variables                    | 7      | Clearly define all outcomes, exposures, predictors, potential confounders, and effect modifiers. Give diagnostic criteria, if applicable                                             | 4-6                |
| Data sources/<br>measurement | 8*     | For each variable of interest, give sources of data and details of methods of assessment (measurement). Describe comparability of assessment methods if there is more than one group | 6                  |
| Bias                         | 9      | Describe any efforts to address potential sources of bias                                                                                                                            | NA                 |
| Study size                   | 10     | Explain how the study size was arrived at                                                                                                                                            | 4                  |
| Quantitative variables       | 11     | Explain how quantitative variables were handled in the analyses. If applicable, describe which groupings were chosen and why                                                         | 6                  |
| Statistical methods          | 12     | (a) Describe all statistical methods, including those used to control for confounding                                                                                                | 6                  |
|                              |        | (b) Describe any methods used to examine subgroups and interactions                                                                                                                  | 6                  |
|                              |        | (c) Explain how missing data were addressed                                                                                                                                          | 5/6                |
|                              |        | (d) If applicable, explain how loss to follow-up was addressed                                                                                                                       | not applicable     |
|                              |        | (e) Describe any sensitivity analyses                                                                                                                                                | not applicable     |
| <b>Results</b>               |        |                                                                                                                                                                                      |                    |

|                          |     |                                                                                                                                                                                                              |                |
|--------------------------|-----|--------------------------------------------------------------------------------------------------------------------------------------------------------------------------------------------------------------|----------------|
| Participants             | 13* | (a) Report numbers of individuals at each stage of study—eg numbers potentially eligible, examined for eligibility, confirmed eligible, included in the study, completing follow-up, and analysed            | 6/7            |
|                          |     | (b) Give reasons for non-participation at each stage                                                                                                                                                         | 16             |
|                          |     | (c) Consider use of a flow diagram                                                                                                                                                                           | NA             |
| Descriptive data         | 14* | (a) Give characteristics of study participants (eg demographic, clinical, social) and information on exposures and potential confounders                                                                     | 6              |
|                          |     | (b) Indicate number of participants with missing data for each variable of interest                                                                                                                          | 6-11           |
|                          |     | (c) Summarise follow-up time (eg, average and total amount)                                                                                                                                                  | 7/8            |
| Outcome data             | 15* | Report numbers of outcome events or summary measures over time                                                                                                                                               | 6-11           |
| Main results             | 16  | (a) Give unadjusted estimates and, if applicable, confounder-adjusted estimates and their precision (eg, 95% confidence interval). Make clear which confounders were adjusted for and why they were included | not applicable |
|                          |     | (b) Report category boundaries when continuous variables were categorized                                                                                                                                    | not applicable |
|                          |     | (c) If relevant, consider translating estimates of relative risk into absolute risk for a meaningful time period                                                                                             | not applicable |
| Other analyses           | 17  | Report other analyses done—eg analyses of subgroups and interactions, and sensitivity analyses                                                                                                               | 8              |
| <b>Discussion</b>        |     |                                                                                                                                                                                                              |                |
| Key results              | 18  | Summarise key results with reference to study objectives                                                                                                                                                     | 11-15          |
| <b>Limitations</b>       |     |                                                                                                                                                                                                              |                |
| Interpretation           | 20  | Give a cautious overall interpretation of results considering objectives, limitations, multiplicity of analyses, results from similar studies, and other relevant evidence                                   | 14-15          |
| Generalisability         | 21  | Discuss the generalisability (external validity) of the study results                                                                                                                                        | 12-14          |
| <b>Other information</b> |     |                                                                                                                                                                                                              |                |
| Funding                  | 22  | Give the source of funding and the role of the funders for the present study and, if applicable, for the original study on which the present article is based                                                | 16             |

\*Give information separately for cases and controls in case-control studies and, if applicable, for exposed and unexposed groups in cohort and cross-sectional studies.

**Note:** An Explanation and Elaboration article discusses each checklist item and gives methodological background and published examples of transparent reporting. The STROBE checklist is best used in conjunction with this article (freely available on the Web sites of PLoS Medicine at <http://www.plosmedicine.org/>, Annals of Internal Medicine at <http://www.annals.org/>, and Epidemiology at <http://www.epidem.com/>). Information on the STROBE Initiative is available at [www.strobe-statement.org](http://www.strobe-statement.org).

# BMJ Open

## Vestibular syndromes, diagnosis and diagnostic errors in dizzy patients presenting to the emergency department. A cross-sectional study.

|                                 |                                                                                                                                                                                                                                                                                                                                                                                                                                                                                                                                                                                                                                                                                                                                                                                                                                                  |
|---------------------------------|--------------------------------------------------------------------------------------------------------------------------------------------------------------------------------------------------------------------------------------------------------------------------------------------------------------------------------------------------------------------------------------------------------------------------------------------------------------------------------------------------------------------------------------------------------------------------------------------------------------------------------------------------------------------------------------------------------------------------------------------------------------------------------------------------------------------------------------------------|
| Journal:                        | <i>BMJ Open</i>                                                                                                                                                                                                                                                                                                                                                                                                                                                                                                                                                                                                                                                                                                                                                                                                                                  |
| Manuscript ID                   | bmjopen-2022-064057.R1                                                                                                                                                                                                                                                                                                                                                                                                                                                                                                                                                                                                                                                                                                                                                                                                                           |
| Article Type:                   | Original research                                                                                                                                                                                                                                                                                                                                                                                                                                                                                                                                                                                                                                                                                                                                                                                                                                |
| Date Submitted by the Author:   | 25-Jan-2023                                                                                                                                                                                                                                                                                                                                                                                                                                                                                                                                                                                                                                                                                                                                                                                                                                      |
| Complete List of Authors:       | Comolli, Lukas; University of Bern, Department of Otorhinolaryngology, Head and Neck Surgery<br>Korda, Athanasia; University of Bern, Department of Otorhinolaryngology, Head and Neck Surgery<br>Zamaro, Ewa; University of Bern, Department of Otorhinolaryngology, Head and Neck Surgery<br>Wagner, Franca; University of Bern, Department of Diagnostic and Interventional Neuroradiology<br>Sauter, Thomas; Inselspital Universitatsspital Bern, Emergency department<br>Caversaccio, M ; University of Bern, Department of Otorhinolaryngology, Head and Neck Surgery<br>Nikles, Florence; University of Bern, Department of Otorhinolaryngology, Head and Neck Surgery<br>Jung, Simon; University of Bern, Department of Neurology<br>Mantokoudis, Georgios; University of Bern, Department of Otorhinolaryngology, Head and Neck Surgery |
| <b>Primary Subject Heading</b>: | Ear, nose and throat/otolaryngology                                                                                                                                                                                                                                                                                                                                                                                                                                                                                                                                                                                                                                                                                                                                                                                                              |
| Secondary Subject Heading:      | Neurology, Radiology and imaging, Emergency medicine                                                                                                                                                                                                                                                                                                                                                                                                                                                                                                                                                                                                                                                                                                                                                                                             |
| Keywords:                       | Neurotology < OTOLARYNGOLOGY, OTOLARYNGOLOGY, Neurology < INTERNAL MEDICINE, Stroke < NEUROLOGY                                                                                                                                                                                                                                                                                                                                                                                                                                                                                                                                                                                                                                                                                                                                                  |
|                                 |                                                                                                                                                                                                                                                                                                                                                                                                                                                                                                                                                                                                                                                                                                                                                                                                                                                  |

SCHOLARONE™  
Manuscripts



I, the Submitting Author has the right to grant and does grant on behalf of all authors of the Work (as defined in the below author licence), an exclusive licence and/or a non-exclusive licence for contributions from authors who are: i) UK Crown employees; ii) where BMJ has agreed a CC-BY licence shall apply, and/or iii) in accordance with the terms applicable for US Federal Government officers or employees acting as part of their official duties; on a worldwide, perpetual, irrevocable, royalty-free basis to BMJ Publishing Group Ltd ("BMJ") its licensees and where the relevant Journal is co-owned by BMJ to the co-owners of the Journal, to publish the Work in this journal and any other BMJ products and to exploit all rights, as set out in our [licence](#).

The Submitting Author accepts and understands that any supply made under these terms is made by BMJ to the Submitting Author unless you are acting as an employee on behalf of your employer or a postgraduate student of an affiliated institution which is paying any applicable article publishing charge ("APC") for Open Access articles. Where the Submitting Author wishes to make the Work available on an Open Access basis (and intends to pay the relevant APC), the terms of reuse of such Open Access shall be governed by a Creative Commons licence – details of these licences and which [Creative Commons](#) licence will apply to this Work are set out in our licence referred to above.

Other than as permitted in any relevant BMJ Author's Self Archiving Policies, I confirm this Work has not been accepted for publication elsewhere, is not being considered for publication elsewhere and does not duplicate material already published. I confirm all authors consent to publication of this Work and authorise the granting of this licence.

1  
2  
3 1 **TITLE**  
4

5 2 Vestibular syndromes, diagnosis and diagnostic errors in dizzy patients presenting to the emergency  
6 3 department. A cross-sectional study.  
7  
8  
9

10 4  
11  
12 5 **AUTHORS**  
13

14  
15 6 Lukas Comolli<sup>1</sup>, Athanasia Korda<sup>1</sup>, Ewa Zamaro<sup>1</sup>, Franca Wagner<sup>2</sup>, Thomas C. Sauter<sup>3</sup>, Marco D.  
16 7 Caversaccio<sup>1</sup>, Florence Nikles<sup>1</sup>, Simon Jung<sup>4</sup>, Georgios Mantokoudis<sup>1</sup>  
17  
18  
19

20 8  
21  
22 9 **Affiliations:**  
23

24  
25 10 1 Department of Otorhinolaryngology, Head and Neck Surgery, Inselspital, University Hospital Bern  
26 11 and University of Bern, Bern, Switzerland.  
27

28  
29 12 2 Department of Diagnostic and Interventional Neuroradiology, Inselspital, University Hospital Bern  
30 13 and University of Bern, Bern, Switzerland.  
31

32  
33 14 3 Department of Emergency Medicine, Inselspital, University Hospital Bern and University of Bern,  
34 15 Bern, Switzerland.  
35

36  
37 16 4 Department of Neurology, University Hospital Bern and University of Bern, Bern, Switzerland.  
38  
39

40  
41 17 **Word count:** 4432  
42

43  
44 18 **Corresponding author:**

45 19 Prof. Dr. med. Georgios Mantokoudis  
46 20 Head of Otology and Cochlear Implant Dpt  
47 21 University Department of Otorhinolaryngology,  
48 22 Head and Neck Surgery, Inselspital Bern,  
49 23 3010 Bern, Switzerland  
50  
51

52  
53 24  
54 25 Office: +41 31 632 33 22  
55

56 26 Email: [georgios.mantokoudis@insel.ch](mailto:georgios.mantokoudis@insel.ch)  
57

58 27 Website: <http://hno.insel.ch>  
59  
60

## 28 **ABSTRACT**

29 **Objectives:** Our aim was to determine the frequency of vestibular syndromes, diagnoses, diagnostic  
30 errors and resources used in patients with dizziness in the emergency department (ED).

31 **Design:** Retrospective cross-sectional study

32 **Setting:** Tertiary referral hospital

33 **Participants:** Adult patients presenting with dizziness

34 **Primary and secondary outcome measures:** We collected clinical data from the initial ED report  
35 from 07/2015 until 08/2020 and compared with the follow-up report if available. We calculated the  
36 prevalence of vestibular syndromes and stroke prevalence in dizzy patients. Vestibular syndromes are  
37 differentiated in acute (AVS) (e.g., stroke, neuritis vestibularis), episodic (EVS) (e.g., BPPV, TIA) and  
38 chronic (CVS) (e.g., PPPD) vestibular syndrome. We reported the rate of diagnostic errors using the  
39 follow-up diagnosis as reference standard.

40 **Results:** We included 1535 patients with dizziness. 19.7% (303) of the patients presented with AVS,  
41 34.7% (533) with EVS, 4.6% (71) with CVS, and 40.9% (628) with no or unclassifiable vestibular  
42 syndrome. The three most frequent diagnosis were stroke / minor stroke (10.1%, 155), benign  
43 paroxysmal positional vertigo (9.8%, 150) and vestibular neuritis (9.6%, 148). In patients with an AVS  
44 25.4% (77) had a stroke. The cause of the dizziness remained unknown in 45.0% (692) and 18.0%  
45 received a false diagnosis. In 662 (43.1%) cases follow-up was available and 58.2% with an initially  
46 unknown diagnoses received a final diagnosis. Overall, 69.9% of all 1535 dizzy patients received  
47 neuroimaging (MRI 58.2%, CT 11.6%) in the ED.

48 **Conclusions:** One fourth of dizzy patients in the ED presented with AVS with a high prevalence (10%)  
49 of vestibular strokes. EVS was more frequent, however, the rate of undiagnosed dizzy patients and the  
50 number of patients receiving neuroimaging was high. Almost half of them still remained without  
51 diagnosis and among those diagnosed were often misclassified. Many unclear cases of vertigo could  
52 be diagnostically clarified after a follow-up visit.

## 56 **Strengths and limitations**

- 1  
2  
3 57 • This cross-sectional study includes a large number of dizzy patients visiting the emergency  
4  
5 58 department.
- 6  
7 59 • We report the frequency of vestibular syndromes based on the international classification of  
8  
9 60 the Bárány society.
- 10  
11 61 • For a more accurate classification into vestibular syndromes a prospective longitudinal study  
12  
13 62 design would be needed
- 14  
15 63 • We observed a referral bias (tertiary referral center) leading to a higher proportion of  
16  
17 64 dangerous diagnoses in dizzy patients
- 18  
19 65 • Since the treating clinician decided whether a follow-up was pursued there might be a  
20  
21 66 selection bias

22  
23 67 **Key words:** vestibular syndromes, acute vestibular syndrome, episodic vestibular syndrome,  
24  
25 68 frequencies, vertigo, dizziness, emergency department, diagnostic errors

26  
27  
28  
29  
30 70 **BACKGROUND**

31  
32  
33 71 Patients with dizziness presenting in the emergency department (ED) often suffer from accompanying  
34  
35 72 symptoms such as nausea, vomiting, gait disturbance and motion intolerance, summarized as a  
36  
37 73 vestibular syndrome.[1] There is no direct link to a specific cause such as a peripheral or central  
38  
39 74 disorder,[2] however, physicians might narrow down their differential diagnosis by classifying into three  
40  
41 75 basic categories of vestibular syndromes.[3]: Episodic, acute and chronic vestibular syndrome. Such  
42  
43 76 classification is based on the time course and duration of symptoms as well as on whether the  
44  
45 77 symptoms are continuous or repetitive. This means a paradigm shift from classical teaching,[4] which  
46  
47 78 is focusing on history taking and investigating symptom quality such as vertigo, disequilibrium,  
48  
49 79 presyncope and non-specific dizziness. Previous investigations proved that description of symptom  
50  
51 80 quality is imprecise and inaccurate for diagnostic decisions.[5] The classification into different  
52  
53 81 vestibular syndromes is internationally accepted and was introduced in the recently revised  
54  
55 82 International Classification of Diseases from the World Health Organization (WHO) (ICD-11 and ICD-  
56  
57 83 12 code, 2016).[6] This new definition was elaborated by the international and interdisciplinary Bárány  
58  
59 84 Society. It allows physicians to recognize patterns, to apply different diagnostic tests based on their  
60  
85 classification and to reduce the number of differential diagnoses; however, the frequency of vestibular



1  
2  
3 86 syndromes and their underlying diagnosis remains poorly investigated. In addition, there is an  
4  
5 87 expected overlap of timing and symptoms within each syndrome since any acute vestibular syndrome  
6  
7 88 might persist and develop into a chronic disease or might occur repetitively with symptom free  
8  
9 89 intervals.

10  
11 90 We therefore sought to investigate the frequency of vestibular syndromes, to assess the underlying  
12  
13 91 diagnosis stratified by syndromes, the frequency of diagnostic errors comparing the initial with the  
14  
15 92 follow-up visit and to describe the resource consumption in the ED.

## 17 93 **METHODS**

18  
19  
20 94 In this retrospective cross-sectional study, we used data collected prospectively during screening for  
21  
22 95 the DETECT (Dizziness Evaluation Tool for Emergent Clinical Triage) study.[7–10] The sample size  
23  
24 96 for this study was given through the DETECT study, where a sample size of 200 Patients with an AVS  
25  
26 97 was needed. We used the screening data which was needed to recruit these 200 patients. We were  
27  
28 98 looking for patients presenting to the ED of the Inselspital Bern (University Hospital and tertiary referral  
29  
30 99 hospital) with an AVS and a suspected stroke diagnosis. Research fellows trained in neurotology  
31  
32 100 prospectively screened and identified dizzy patients during daytime hours from 07/2015 to 08/2020  
33  
34 101 using either the ED triage software system (chief complaints such as “dizziness”, “vertigo”,  
35  
36 102 “unsteadiness”, “presyncope”, “vomiting”, “nausea” or a suspected diagnosis) or direct information  
37  
38 103 from the emergency physician. We included all ED patients presenting with dizziness older than 16  
39  
40 104 years (ED index visit). We use dizziness as an umbrella term throughout the manuscript including the  
41  
42 105 following set of symptoms: vertigo, dizziness, gait or balance unsteadiness, ataxia and syncope or  
43  
44 106 presyncope. We collected data about baseline demographics, medical history, clinical findings,  
45  
46 107 resources used, as well as diagnoses. In a second step, we retrospectively compared data from the  
47  
48 108 index visit in the ED with data collected in patients who received a follow-up examination at our  
49  
50 109 hospital’s dizziness clinic within 90 days after presentation to the ED (follow-up visit).

### 51 110 **Classification of vestibular syndromes**

52  
53  
54 111 We classified all included patients into 5 categories based on the international classification from the  
55  
56 112 Bárány Society[1] and predefined criteria:[3] 1) Acute, 2) episodic and 3) chronic vestibular syndrome,  
57  
58 113 4) acute imbalance syndrome and 5) patients not classifiable (“unclear”). We defined vestibular  
59  
60 114 syndromes as follows:

1  
2  
3 115 1) *Acute vestibular Syndrome*  
4

5  
6 116 The acute vestibular syndrome (AVS) is defined as a clinical syndrome of acute onset, continuous  
7  
8 117 dizziness lasting day to weeks, and generally including features suggestive of new, ongoing vestibular  
9  
10 118 system dysfunction (e.g., vomiting, nystagmus, severe postural instability).[1] Although this syndrome  
11  
12 119 is characterized by a single, monophasic event due to a one-time disorder, it might be the beginning of  
13  
14 120 a recurrent disease or a progressive illness course. Thus, AVS might overlap with other syndromes  
15  
16 121 explained below or change over time. There are sub classifications of AVS mentioned in the  
17  
18 122 literature[11] such as t-AVS (post-exposure dizziness after trauma or toxic exposure) or s-AVS  
19  
20 123 (spontaneous AVS) including all patients with continuous dizziness at rest. For the sake of simplicity,  
21  
22 124 we classified all these patients under the umbrella term of AVS.

23  
24 125 2) *Episodic vestibular syndrome*

25  
26 126 The episodic vestibular syndrome (EVS) is characterized as transient dizziness lasting seconds to  
27  
28 127 hours, rarely days. It is accompanied by a short duration of nausea, nystagmus and sudden falls.[1]  
29  
30 128 EVS can occur repetitively (episodes) caused by an episodic disorder with repeated spells, or as a  
31  
32 129 single event (first manifestation) of a progressive chronic disorder with a transient or recurrent  
33  
34 130 dizziness. There are subtypes of EVS with associated triggers (t-EVS) or without triggers (s-EVS,  
35  
36 131 spontaneous EVS). Diagnoses of s-EVS is mainly based on the patient's history. Patients with t-EVS  
37  
38 132 have often clinical signs such as positional nystagmus after provocation. Both subgroups were  
39  
40 133 included as EVS without separate differentiation.

41 134 3) *Chronic vestibular syndrome*

42  
43 135 The chronic vestibular syndrome (CVS) lasts usually months to years and is generally associated with  
44  
45 136 a persistent vestibular system dysfunction (e.g., oscillopsia, nystagmus, gait unsteadiness, falls).

46  
47 137 4) *Acute imbalance/dysbalance syndrome*

48  
49 138 Patients with symptoms that did not meet definitions 1-3 and therefore a vestibular syndrome could be  
50  
51 139 excluded, were classified as an acute imbalance syndrome (AIS).[12,13] Patients with dizziness as an  
52  
53 140 isolated symptom and no accompanying symptoms or no nystagmus were therefore classified as  
54  
55 141 "AIS".

56 142 5) *Unclear vestibular syndrome*

57  
58 143 If the information in the medical report was not specific enough to decide whether it was a vestibular  
59  
60 144 syndrome or not, they were labeled as "unclear".

1  
2  
3 145 The type of syndromes and diagnoses from the index visit (ED diagnosis) and the follow-up exam  
4  
5 146 (follow-up or final diagnosis) were analyzed and compared, if available. We only included the main  
6  
7 147 diagnosis reasonable for causing dizziness, additional diagnoses were classified as “other diagnoses”.  
8  
9 148 Patients with more than one differential diagnosis causing dizziness were classified as “unknown”.  
10  
11 149 Patients were reclassified regarding the type of vestibular syndrome based on the time course of  
12  
13 150 symptoms and signs. Patients e.g., with symptoms lasting less than 24 hours or with repetitive events  
14  
15 151 were reported or re-classified as EVS. Misclassified EVS patients were often sent home within a few  
16  
17 152 hours after symptom onset. Initially misclassified EVS with persistent symptoms, however, were re-  
18  
19 153 classified as AVS.

20  
21 154 We calculated the overall rate of diagnostic errors between the initial ED diagnosis and the follow-up  
22  
23 155 diagnosis using the follow-up diagnosis as reference standard. We also reported the change of  
24  
25 156 diagnoses rate stratified by ED diagnoses. The rate of changes of diagnoses at follow-up was  
26  
27 157 calculated as follows:  $100 * (1 - \text{correct diagnoses} / \text{total diagnoses ED})$ . The diagnosis was assumed  
28  
29 158 to be correct if it did not change from the initial to the follow-up diagnosis.

### 30 31 159 **Statistics**

32  
33 160 We used SPSS (IBM Corp. Released 2020. IBM SPSS Statistics for Windows, Version 27.0. Armonk,  
34  
35 161 NY: IBM Corp) for statistics and descriptive data analysis. We did a subgroup analysis on those  
36  
37 162 patients who received a follow-up examination. Cross tabulations were used to compare results at the  
38  
39 163 ED index visit with the follow-up visit. Cohen’s Kappa was calculated to report the concordance  
40  
41 164 between index visit and follow-up regarding the classification of vestibular syndromes and diagnoses.  
42  
43 165 We defined a change in the diagnosis at the follow-up as a diagnostic error.

### 44 45 46 166 **Patient and public involvement**

47  
48 167 Patients or the public were not involved in our research design, conduct, reporting or dissemination  
49  
50 168 plans.

## 51 52 53 169 **RESULTS**

### 54 55 56 170 **Prevalence of vestibular syndromes and underlying diagnoses**

57  
58 171 We included 1535 Patients aged from 16 to 98 (mean 55.7 years +/-SD 18.6 years) who presented  
59  
60 172 with dizziness as a chief complaint. Our cohort consisted of 745 (48.5%) men and 790 (51.5%)

173 women. The age and gender distribution are shown as a histogram in the additional file 1 (figure S1).  
 174 Of all patients, 303 presented with AVS (19.7%), 533 with EVS (34.7%), 71 with CVS (4.6%) and 472  
 175 patients had an AIS (30.8%). In 156 cases (10.2%), the type of vestibular syndrome remained unclear  
 176 or was not classifiable based on clinical and reported findings. Since several diagnoses could be  
 177 selected, there were more diagnoses than cases.

178 The five most frequent diagnoses including all types of vestibular syndromes were strokes (n=155,  
 179 10.1%), benign paroxysmal positional vertigo (BPPV) (n=150, 9.8%), acute unilateral vestibulopathy  
 180 (n=148, 9.6%), transient ischemic attack (TIA) (n=77, 5.0%) and dysautonomia (n=63, 4.1%). In 692  
 181 cases (45.0%) the diagnosis remained unknown. A dysautonomia was diagnosed when the “Schellong  
 182 test” was positive.[14] Table 1 shows the frequency of diagnoses stratified by vestibular syndromes.

183 **Table 1:** ED diagnoses stratified by vestibular syndromes

| Diagnose                                                   | total<br>(n=1535) | AVS<br>(n=303) | EVS<br>(n=533) | CVS<br>(n=71) | AIS<br>(n=472) | Unclear<br>(n=156) |
|------------------------------------------------------------|-------------------|----------------|----------------|---------------|----------------|--------------------|
| Stroke / Minor Stroke                                      | 155 (10.10%)      | 77 (25.41%)    | 10 (1.88%)     | 2 (2.82%)     | 61 (12.92%)    | 5                  |
| BPPV                                                       | 150 (9.77%)       | 1 (0.33%)      | 143 (26.83%)   | 0 (0.00%)     | 1 (0.21%)      | 5                  |
| Acute unilateral vestibulopathy (e.g. Vestibular Neuritis) | 148 (9.64%)       | 127 (41.91%)   | 9 (1.69%)      | 2 (2.82%)     | 8 (1.69%)      | 2                  |
| TIA                                                        | 77 (5.02%)        | 8 (2.64%)      | 55 (10.32%)    | 2 (2.82%)     | 9 (1.91%)      | 3                  |
| Dysautonomia                                               | 63 (4.10%)        | 0 (0.00%)      | 14 (2.63%)     | 1 (1.41%)     | 47 (9.96%)     | 1                  |
| Vestibular migraine                                        | 35 (2.28%)        | 1 (0.33%)      | 31 (5.82%)     | 1 (1.41%)     | 1 (0.21%)      | 1                  |
| Menière's disease                                          | 22 (1.43%)        | 1 (0.33%)      | 20 (3.75%)     | 0 (0.00%)     | 0 (0.00%)      | 1                  |
| PPPD                                                       | 22 (1.43%)        | 1 (0.33%)      | 2 (0.38%)      | 9 (12.68%)    | 7 (1.48%)      | 3                  |
| Tumor                                                      | 17 (1.11%)        | 3 (0.99%)      | 1 (0.19%)      | 2 (2.82%)     | 10 (2.12%)     | 1                  |
| Trauma                                                     | 13 (0.85%)        | 0 (0.00%)      | 1 (0.19%)      | 0 (0.00%)     | 9 (1.91%)      | 3                  |
| Medical side effects                                       | 11 (0.72%)        | 0 (0.00%)      | 2 (0.38%)      | 0 (0.00%)     | 8 (1.69%)      | 1                  |
| Heart disease                                              | 10 (0.65%)        | 1 (0.33%)      | 0 (0.00%)      | 0 (0.00%)     | 8 (1.69%)      | 1                  |
| Labyrinthitis                                              | 9 (0.59%)         | 7 (2.31%)      | 1 (0.19%)      | 1 (1.41%)     | 0 (0.00%)      | 0                  |
| Infectious disease                                         | 7 (0.46%)         | 6 (1.98%)      | 0 (0.00%)      | 1 (1.41%)     | 0 (0.00%)      | 0                  |
| Metabolic                                                  | 7 (0.46%)         | 1 (0.33%)      | 0 (0.00%)      | 0 (0.00%)     | 5 (1.06%)      | 1                  |
| Neurodegenerative disease                                  | 5 (0.33%)         | 1 (0.33%)      | 0 (0.00%)      | 0 (0.00%)     | 4 (0.85%)      | 0                  |
| Acoustic neuroma                                           | 4 (0.26%)         | 1 (0.33%)      | 0 (0.00%)      | 2 (2.82%)     | 1 (0.21%)      | 0                  |
| Vestibular Paroxysmia                                      | 1 (0.07%)         | 0 (0.00%)      | 1 (0.19%)      | 0 (0.00%)     | 0 (0.00%)      | 0                  |
| Others                                                     | 110 (7.17%)       | 13 (4.29%)     | 10 (1.88%)     | 8 (11.27%)    | 67 (14.19%)    | 12                 |
| Unknown                                                    | 692 (45.08%)      | 62 (20.46%)    | 239 (44.84%)   | 44 (61.97%)   | 228 (44.31%)   | 119                |
| Total <sup>1)</sup>                                        | 1558              | 311            | 539            | 75            | 474            | 159                |

184 <sup>1)</sup>Since several diagnoses can be selected per case, there are more diagnoses than cases. For each diagnosis  
 185 the corresponding syndrome is listed in the table, so the total number of the syndromes is higher.

186 Abbreviations: AVS (acute vestibular syndrome), EVS (episodic vestibular syndrome), CVS (chronic vestibular  
187 syndrome), AIS (acute imbalance syndrome), BPPV (benign paroxysmal positional vertigo), TIA (transient  
188 ischemic attack), PPPD (persistent postural-perceptual dizziness)

189

## 190 Accuracy of syndrome classification

191 662 (43.1%) out of 1535 patients received a follow-up. There was an excellent agreement (Cohen's  
192 Kappa = 0,909,  $p < 0.001$ ) between the syndrome classification at index visit and follow-up with a  
193 reported change of the acute vestibular syndrome in 3.2% after the follow-up. Most of the misclassified  
194 AVS patients were reassessed as EVS. EVS patients, however, were misclassified in 3.6%. Among  
195 the patients with an AIS on the ED, the re-classification rate was 8.0%, whereas 1 patient was  
196 subsequently classified as AVS. In the cases that could not be initially classified in the ED, 34.7%  
197 could be classified as a vestibular syndrome or AIS in the follow-up examination (table 2).

198 **Table 2:** Cross tabulation - vestibular syndrome ED vs. follow-up (n=662)

|    |         | Follow-up |     |     |     |         |       | Change of<br>syndrome<br>[%] |
|----|---------|-----------|-----|-----|-----|---------|-------|------------------------------|
|    |         | AVS       | EVS | CVS | AIS | unclear | total |                              |
| ED | AVS     | 215       | 5   | 0   | 1   | 1       | 222   | 3.15%                        |
|    | EVS     | 5         | 187 | 0   | 2   | 0       | 194   | 3.61%                        |
|    | CVS     | 0         | 0   | 34  | 0   | 0       | 34    | 0.00%                        |
|    | AIS     | 1         | 6   | 3   | 150 | 3       | 163   | 7.98%                        |
|    | unclear | 4         | 6   | 2   | 5   | 32      | 49    | 34.69%                       |
|    | total   | 225       | 204 | 39  | 158 | 36      | 662   |                              |

199

## 200 Diagnostic errors in dizzy patients

201 In this section, we compare the diagnosis at ED with the diagnosis at follow-up (n=662). We report an  
202 overall change in diagnosis between initial ED assessment and follow-up of 31.4 %. The proportion of  
203 diagnostic errors (excluding patients with unknown causes) was 18.0%. There was a moderate to low  
204 agreement between the initial diagnosis (ED diagnosis) and the final diagnosis after the follow-up  
205 (Cohen's Kappa = 0.609,  $p < 0.001$ ). Often diagnostic errors occurred in patients with dysautonomia  
206 (33%, 6/9), TIA (30.6%, 15/49), BPPV (28.6%, 8/28), Menière's disease (26.7%, 4/15), stroke / minor  
207 stroke (13.6%, 18/132) and for acute unilateral vestibulopathy (15.7%, 14/89). Of the cases with an  
208 initial diagnosis of TIA, the diagnosis was changed during follow-up to "stroke/minor stroke" in seven

209 and to “unknown” in four cases (table 3 and additional file 1 table S1). The cause of the dizziness was  
 210 at the time of the ED visit unknown in 37.6%. In 104 out of 662 cases the diagnosis remained unclear  
 211 even after the follow-up exam, however, 58.2% of all unknown cases in the ED received finally a  
 212 diagnosis and could be clarified (table 4). A special focus was placed on patients with an undiagnosed  
 213 dangerous cause of dizziness (strokes / minor strokes, TIA) leading to potential diagnosis-related  
 214 harm. There were two patients initially diagnosed with BBPV, three with acute unilateral vestibulopathy  
 215 and one case with a medical side effect where the initial diagnosis was changed to TIA or a stroke /  
 216 minor stroke at follow-up. Among patients with no specific diagnoses in the ED (classified as  
 217 unknown/unclear), 14 patients had a stroke and 9 a TIA. In summary, in 29 of the 662 followed-up  
 218 cases (4.4%) a dangerous diagnosis was found at follow-up (potential diagnosis-related harms) which  
 219 was initially not diagnosed in the ED (see additional file 1 table S1, bold cases).

220 **Table 3:** Number of diagnostic errors, change of diagnosis rates, missed dangerous diagnoses and  
 221 mimics.

| ED Diagnoses                                               | Total ED | # of diagnostic errors | Change of diagnosis* | # of missed strokes or TIA | Frequency of undiagnosed underlying diseases (top 3)**                             |
|------------------------------------------------------------|----------|------------------------|----------------------|----------------------------|------------------------------------------------------------------------------------|
| Stroke / Minor stroke                                      | 132      | 18                     | 13.6%                | 5 (TIA)                    | TIA (5)<br>Acute unilateral vestibulopathy (4)<br>Dysautonomia (1)                 |
| Acute unilateral vestibulopathy (e.g. Vestibular Neuritis) | 89       | 14                     | 15.7%                | 3                          | Stroke / Minor stroke (2)<br>Menière (2)<br>Others (2)                             |
| TIA                                                        | 49       | 15                     | 30.6%                | 7 (strokes)                | Stroke / Minor stroke (7)<br>BPPV (1)<br>Metabolic (1)<br>Medical side effects (1) |
| BPPV                                                       | 28       | 8                      | 28.6%                | 2                          | Acute unilateral vestibulopathy (3)<br>Stroke / Minor stroke (2)<br>Others (2)     |
| Menière's disease                                          | 15       | 4                      | 26.7%                | 0                          | Acute unilateral vestibulopathy (3)<br>Labyrinthitis (1)                           |
| Tumor                                                      | 14       | 1                      | 7.1%                 | 0                          | 0                                                                                  |
| Vestibular migraine                                        | 12       | 3                      | 25.0%                | 0                          | Others (2)<br>PPPD (1)                                                             |
| Dysautonomia                                               | 9        | 3                      | 33.3%                | 0                          | Others (2)<br>Heart disease (2)<br>Medical side effects (1)                        |
| Labyrinthitis                                              | 7        | 2                      | 28.6%                | 0                          | Acute unilateral vestibulopathy (1)<br>Acoustic neurinoma (1)                      |

|                    |     |     |       |    |                                                                                                           |
|--------------------|-----|-----|-------|----|-----------------------------------------------------------------------------------------------------------|
| Infectious disease | 6   | 3   | 50.0% | 0  | Acute unilateral vestibulopathy (3)                                                                       |
| Heart disease      | 5   | 0   | 0.0%  | 0  | 0                                                                                                         |
| PPPD               | 5   | 0   | 0.0%  | 0  | 0                                                                                                         |
| Others***          | 42  | 4   | 9.5%  | 0  | Dysautonomia (2)<br>BPPV (1)<br>Tumor (1)                                                                 |
| Unknown            | 249 | 145 | 58.2% | 23 | Acute unilateral vestibulopathy (35)<br>Vestibular migraine (22)<br>Stroke / Minor stroke (14)<br>TIA (9) |
| Total              | 662 | 222 | 31.4% | 40 |                                                                                                           |

222 \*Since multiple answers were possible for the diagnoses, the number of diagnostic errors did not  
223 necessarily correspond to the proportion of change of diagnosis. The rate of changes of diagnoses at  
224 follow-up is calculated as follows:  $100 * (1 - \text{correct diagnoses} / \text{total diagnoses ED})$ .

225 \*\*Undiagnosed underlying diseases: This column shows the most frequent changed diagnosis based  
226 on the follow-up exam.

227 \*\*\*Diagnoses less frequent than five are not listed in the table.

228 **Table 4:** Unknown ED diagnoses resolved after follow-up

| Diagnoses at Follow-up                                     | unknown ED diagnoses (n=249) | Frequency |
|------------------------------------------------------------|------------------------------|-----------|
| Acute unilateral vestibulopathy (e.g. Vestibular Neuritis) | 35                           | 14.06%    |
| Others                                                     | 28                           | 11.24%    |
| Vestibular migraine                                        | 22                           | 8.84%     |
| Stroke                                                     | 14                           | 5.62%     |
| TIA                                                        | 9                            | 3.61%     |
| Dysautonomia                                               | 8                            | 3.21%     |
| Menière's disease                                          | 8                            | 3.21%     |
| BPPV                                                       | 6                            | 2.41%     |
| PPPD                                                       | 6                            | 2.41%     |
| Unknown etiology central vestibular syndrome               | 4                            | 1.61%     |
| Metabolic disorders                                        | 3                            | 1.20%     |
| Tumor                                                      | 1                            | 0.40%     |
| Medical side effects                                       | 1                            | 0.40%     |
| Heart disease                                              | 1                            | 0.40%     |
| Labyrinthitis                                              | 1                            | 0.40%     |
| Infectious disease                                         | 1                            | 0.40%     |
| Trauma                                                     | 0                            | 0.00%     |
| Neurodegenerative disease                                  | 0                            | 0.00%     |
| Acoustic neuroma                                           | 0                            | 0.00%     |
| Unknown                                                    | 104                          | 41.77%    |

229

## 230 ED resource use

231 Overall, 69.9% of all 1535 dizzy patients received neuroimaging at the ED visit (MRI 58.2%, CT  
 232 11.6%). 16.8% of stroke patients underwent a computed tomography (CT), 89.7% an MRI. Patients  
 233 with a BPPV received in 41.3% an MRI and in 8% a CT showing a similar resource use as patients  
 234 with acute unilateral vestibulopathy (48% MRI, 6.8% CT). Table 5 shows details of ED resource use  
 235 stratified by ED diagnoses.

236 **Table 5:** ED Resources stratified by diseases (n=1535)

|                    | Stroke /<br>Minor Stroke | BPPV       | Acute<br>unilateral<br>vestibulopathy | TIA        | Menière's<br>disease | PPPD      | Trauma    |
|--------------------|--------------------------|------------|---------------------------------------|------------|----------------------|-----------|-----------|
| MRI                | 139 (89.7%)              | 62 (41.3%) | 71 (48.0%)                            | 62 (80.5%) | 11 (50.0%)           | 9 (40.9%) | 3 (23.1%) |
| CT                 | 26 (16.8%)               | 12 (8.0%)  | 10 (6.8%)                             | 13 (16.9%) | 0 (0.0%)             | 0 (0.0%)  | 6 (46.2%) |
| Audiology          | 5 (3.2%)                 | 16 (10.7%) | 90 (60.8%)                            | 6 (7.8%)   | 12 (54.5%)           | 1 (4.5%)  | 0 (0.0%)  |
| Caloric            | 8 (5.2%)                 | 26 (17.3%) | 115 (77.7%)                           | 11 (14.3%) | 9 (40.9%)            | 2 (9.1%)  | 0 (0.0%)  |
| vHIT               | 4 (2.6%)                 | 6 (4.0%)   | 41 (27.7%)                            | 3 (3.9%)   | 2 (9.1%)             | 1 (4.5%)  | 0 (0.0%)  |
| Total<br>diagnoses | 155                      | 150        | 148                                   | 77         | 22                   | 22        | 13        |

## 238 DISCUSSION

239 One fifth to one third of dizzy patients presented symptoms consisting of AVS or EVS. Another third of  
 240 patients were not classifiable based on current criteria. Patients with CVS were noticeably less likely to  
 241 present to the ED. In more than one third of the cases, which received a follow-up, the diagnosis was  
 242 changed. Diagnostic uncertainty could be resolved at the follow-up visit in more than half of patients  
 243 with unknown or unclear diagnosis. We found that a great number of imaging studies were ordered for  
 244 dizziness workup.

### 245 Prevalence of vestibular syndromes and underlying diagnoses

246 The reported prevalence of AVS in the literature ranges from 10% to 22%, [2, 15] which matches our  
 247 findings in the ED (20%). Our reported prevalence in the ED is not generalizable to other settings such  
 248 as outpatient clinics, where the proportion of chronic vestibular syndromes might predominate. Violent  
 249 vertigo attacks in patients with recurrent vertigo (EVS) might prompt patients to visit the ED rather than  
 250 an outpatient clinic resulting in a high prevalence of 35%. The most common ED diagnoses in the total



1  
2  
3 251 ED population were stroke / minor stroke, BPPV, and acute unilateral vestibulopathy, which is in  
4  
5 252 agreement with other reports.[16,17] The posterior canal BPPV is the most common with 85-95% of  
6  
7 253 BPPV cases. It can be diagnosed with the Dix-Hallpike maneuver which provokes a pathognomonic  
8  
9 254 torsional upbeat nystagmus.[18] If spontaneous nystagmus is present, a diagnosis other than posterior  
10  
11 255 BPPV should be considered and positional testing is not advised. The ED prevalence of strokes /  
12  
13 256 minor stroke was 10% in our study, which is considerably higher than previously described (~4%  
14  
15 257 cerebrovascular).[16,19,20] The reported prevalence, however is consistent with our previous,  
16  
17 258 retrospective study from the same center with another sample.[21] In patients with AVS, however, the  
18  
19 259 prevalence of stroke is significantly higher at 25.4% probably due to a referral bias of a tertiary care  
20  
21 260 center including the largest stroke center of the country. Despite extensive investigations reflected in  
22  
23 261 the resources used, almost half of the cases remained undiagnosed, which is higher compared to 22%  
24  
25 262 in another cross-sectional study.[16] One reason for the higher number of “unknown” causes could be  
26  
27 263 due to the applied classification rules classifying patients with multiple differential diagnoses as  
28  
29 264 “unknown”.

### 30 265 **Accuracy of syndrome classification**

31  
32  
33 266 Overall, the accuracy of the classification into three different vestibular syndromes was high. In one-  
34  
35 267 tenth of the cases, the documented history was not sufficient to decide whether the patient had a  
36  
37 268 vestibular syndrome. Possible reasons for this were a lack of documentation or an inappropriate  
38  
39 269 history taking. In the group with a follow-up examination, more than one third of the unclear ED cases  
40  
41 270 could be assigned to a vestibular syndrome or a vestibular syndrome could be excluded based on the  
42  
43 271 extended history of the follow-up report. This finding emphasizes the importance of taking a targeted  
44  
45 272 history (asking timing and triggers)[11,22] and the need of a follow-up to better assess the time course  
46  
47 273 of dizziness. Digital decision support tools might assist physicians to take a structured and complete  
48  
49 274 history. It is therefore important to improve digital competencies in the future.[23] Overall, there were  
50  
51 275 only a few misclassifications of vestibular syndromes in the ED. Misclassified EVS patients presenting  
52  
53 276 initially as AVS had a short duration of symptoms which abated after the ED discharge. Diagnoses  
54  
55 277 with EVS being at risk for misclassification as AVS included vestibular migraine, Menière’s disease  
56  
57 278 and TIA. Main reason for misclassification was the first time occurrence of episodic dizziness with no  
58  
59 279 previous history of dizzy episodes as mandated by international diagnostic criteria.[24,25] We also  
60  
280 found misclassifications of AVS as EVS in patients with cerebral strokes, vestibular neuritis and with

1  
2  
3 281 dysautonomia. Infarctions in the cerebellum (mainly PICA territory) can mimic positional vertigo,  
4  
5 282 known as pseudo-BPPV.[26] Finally, each patient with an AVS suffers from motion intolerance, which  
6  
7 283 can be misinterpreted as positional vertigo.  
8  
9  
10 284

### 11 12 285 **Diagnostic errors in dizziness patients**

13  
14 286 The terminology and definitions regarding diagnostic errors is under debate.[27] It can be used as an  
15  
16 287 umbrella term including preventable, reducible or unavoidable diagnostic errors.[28] Our data,  
17  
18 288 however, were not sufficient to assess the underlying diagnostic processes and workups leading to a  
19  
20 289 specific diagnosis. We avoided, therefore, terms such as 'misdiagnosis', because such conclusions  
21  
22 290 might be perceived as implicating errors in the diagnostic process, which we did not investigate. A sub  
23  
24 291 classification into diagnostic process failure or diagnostic label failure was not possible based on our  
25  
26 292 design. Diagnosing dizziness is a challenge for ED physicians and diagnostic errors are unavoidable  
27  
28 293 even for experts in the field (following an optimal diagnostic process) due to the nature and complexity  
29  
30 294 of the underlying diseases.[29] Thus, we aim to increase awareness about an unresolved issue  
31  
32 295 regarding diagnostic accuracy in dizzy patients visiting the ED. In a German retrospective study, 124  
33  
34 296 of 475 dizziness patients (26%) received follow-up.[17] This number is lower than the number of  
35  
36 297 patients followed up in our study (43.1%). This selection bias has to be kept in mind, interpreting the  
37  
38 298 presented results. The decision to schedule patients for follow-up could reflect an intimate uncertainty  
39  
40 299 with the diagnosis or be an expression of increased caution of the treating physician with that  
41  
42 300 particular patient. In another study from our department on diagnostic errors the "feeling of atypical  
43  
44 301 presentation" was the only predictor of a diagnostic error.[30] This "feeling of atypical presentation" is  
45  
46 302 likely to prompt follow-up visits leading to a selection bias in our follow-up patients. We cannot exclude  
47  
48 303 any change in diagnosis within the observed period of 90days, however, the occurrence of a second  
49  
50 304 cause of dizziness unrelated to the initial diagnosis is very unlikely. In the German study, ED diagnosis  
51  
52 305 was corrected in 43%.[17] We observed a lower rate of diagnostic errors in our study (31%). Of the  
53  
54 306 benign ED diagnoses, 6% (n= 7 of 124) were finally diagnosed with a dangerous diagnosis during  
55  
56 307 follow-up in the German study[17] compared to 4% (n= 29 of 662) in our study. Patients in our study,  
57  
58 308 however, received significantly more often MRIs in the ED (58% MRI vs. 18%). Another study reported  
59  
60 309 a higher stroke misdiagnosis rate[20], however, ED physician misdiagnosis rate was based on  
310 310 retrospective chart reviews derived from non-academic community hospital with limited access to

1  
2  
3 311 neuroimaging and neurology expertise. This might contribute to the higher number of missed  
4  
5 312 dangerous diagnoses (diagnosis related harm). Despite extensive ED workups in our study (including  
6  
7 313 neuroimaging), four patients were still diagnosed as vestibular neuritis or BPPV and finally had a  
8  
9 314 stroke (Pseudo-neuritis or Pseudo-BPPV) without any focal neurological signs. Recent literature  
10  
11 315 confirms that 50% of patients with vestibular strokes might have isolated dizziness.[31,32] The MRI  
12  
13 316 misses 10-20% of strokes presenting with AVS during the first 24-48h after onset.[33] Up to 50% false  
14  
15 317 negative MRIs are reported for smaller vestibular strokes (<1cm).[31] The 'HINTS' examination can be  
16  
17 318 a possible solution for this dilemma. This three-step bedside exam, introduced in 2009,[34] includes  
18  
19 319 the head impulse test, nystagmus test and test of skew and is more sensitive for stroke than early  
20  
21 320 MRI. The application of a portable device using an eye-tracker and head accelerometers allows a  
22  
23 321 quantitative and accurate stroke prediction in patients with AVS.[7,35-37] The comparison between  
24  
25 322 diagnoses at the index (ED) and the follow-up visit shows that in many cases a definite diagnosis can  
26  
27 323 only be made over time. This is often due to diagnostic criteria that require repetitive episodes of  
28  
29 324 vertigo.[24,25] Some patients are symptom-free in the interval between episodes of dizziness or at the  
30  
31 325 time of the emergency visit.

### 326 **ED resource use**

327 Altogether, neuroimaging was ordered in 70% of cases, of which 83% were MRIs. This high  
328  
329 percentage may be due to the 7/24-availability of MR imaging in our university hospital. We observed  
330  
331 that a large number of MRI was performed in patients who finally received a peripheral vestibular  
332  
333 diagnosis such as BPPV, Menière's disease or an acute unilateral vestibulopathy. The diagnosis of  
334  
335 vestibular disorders can often be established by targeted history taking and clinical examination. There  
336  
337 is no need for neuroimaging in clinical diagnoses such as BPPV with a typical history and typical  
338  
339 positional nystagmus elicited by diagnostic maneuvers.[38] Atypical findings (e.g. in BPPV with  
340  
apogeotropic nystagmus) or a diagnosis of exclusion (e.g. in Menière's disease) might still justify  
neuroimaging (MRI) in the ED. CT scans, however, are only suggested in patients with suspected  
trauma, hemorrhage or in patients with a contraindication for a MRI. The current clinical approach  
leads to an unnecessary overuse of computed tomography and magnetic resonance imaging and  
increases costs exceeding billions of dollars in the US alone.[39] Dizzy patients have longer average  
ED stays than patients without dizziness because they undergo more testing.[16] The rate of  
undiagnosed or misclassified patients remains high, resulting in higher costs and considerable waste

1  
2  
3 341 of resources in the ED in Switzerland.[39–41] Furthermore, the overuse of computed tomography and  
4  
5 342 magnetic resonance imaging may decrease access for other patients and it can increase the  
6  
7 343 exposition to an unnecessary amount of radiation.

#### 9 344 **Strengths and limitations**

11  
12 345 The strengths of the study are the large number of included and screened cases and the  
13  
14 346 determination of vestibular syndromes based on history and follow-up assessments. A more accurate  
15  
16 347 classification into the vestibular syndromes would need, however, a prospective longitudinal study  
17  
18 348 design. We also observed a referral bias (tertiary referral center) leading to a higher proportion of  
19  
20 349 dangerous diagnoses in dizzy patients. In addition, the treating clinician decided whether a follow-up  
21  
22 350 was pursued, which may have caused a selection bias.

#### 24 351 **Implications for clinicians**

26  
27 352 Our study confirms that about a fifth of patients suffers from AVS. The high prevalence of strokes in  
28  
29 353 patients with continuous dizziness (25%), the high number of undiagnosed or misclassified cases  
30  
31 354 should increase the overall awareness regarding diagnostic errors and stroke mimics. Consequently,  
32  
33 355 we suggest a three-stage diagnostic test process for patients presenting with dizziness in the ED. This  
34  
35 356 approach does intend increase diagnostic accuracy and to reduce neuroimaging in the acute stage.  
36  
37 357 We suggest, therefore,

38  
39 358 1) A more sensitive screening (triage) test including a classification into vestibular syndromes  
40  
41 359 (targeted history) and recording of spontaneous nystagmus, 2) a targeted clinical exam with either  
42  
43 360 “HINTS” test[34] in AVS patients or “Dix-Hallpike” examination[38] in EVS patients with triggers and 3)  
44  
45 361 a dedicated neuroimaging (e.g. acute and delayed MRI) in patients with suspected central causes of  
46  
47 362 vertigo. Furthermore, additional tests such as the Bucket Test[42] or stance and gait tests (searching  
48  
49 363 for truncal ataxia)[43] can further increase the sensitivity for the detection of stroke patients.

50  
51 364 In patients with EVS and absence of triggers (suspected Menière’s disease or vestibular migraine) we  
52  
53 365 alternatively suggest as a second stage caloric testing and audiometry in a planned follow-up and as a  
54  
55 366 third stage a delayed neuroimaging (diagnosis of exclusion). Patients without any nystagmus  
56  
57 367 (spontaneous or after provocation) might need a more extended neurological exam such as BE-  
58  
59 368 FAST.[44] Patients with inconclusive or atypical findings might need further assessment for risk factors  
60  
369 (e.g. ABCD2 score)[45] in order to minimize the risk for missed minor strokes and to prevent future

1  
2  
3 370 harmful events. We further recommend a low threshold for organizing a follow-up appointment in dizzy  
4  
5 371 patients since the symptoms and the diagnosis might change over time. This study paves the way for  
6  
7 372 future studies providing epidemiological data including the expected prevalence for each type of  
8  
9 373 vestibular syndrome.

## 10 11 374 **CONCLUSION**

12  
13  
14 375 One fifth of dizzy patients in the ED presented with AVS with a high prevalence (10%) of vestibular  
15  
16 376 strokes. Episodic vertigo (EVS) was more frequent, however, the rate of undiagnosed dizzy patients  
17  
18 377 and the number of patients receiving neuroimaging was high. Almost half of them still remained  
19  
20 378 without diagnosis and among those diagnosed were often misclassified. Many unclear cases of vertigo  
21  
22 379 could be diagnostically clarified after a follow-up visit.

23 380

24 381

25 382

## 26 383 **ABBREVIATIONS**

27 384 ED emergency department

28 385 AVS acute vestibular syndrome

29 386 EVS episodic vestibular syndrome

30 387 AIS acute imbalance syndrome

31 388 CVS chronic vestibular syndrome

32 389 TIA transient ischemic attack

33 390 BPPV benign paroxysmal positional vertigo

34 391 AUVP acute unilateral vestibulopathy

35 392 MRI magnetic resonance imaging

36 393 CT computer tomography

37 394 vHIT video head impulse test

38 395 PPPD persistent postural-perceptual dizziness

39 396 VOG video-oculography

40 397

## 41 398 **DECLARATIONS**

1  
2  
3 399 **Ethics approval and consent to participate:** The study was approved by the local ethics committee  
4  
5 400 (KEK Bern, #2021-00918). Given the retrospective nature of the study, informed consent was provided  
6  
7 401 through a hospital-wide general consent. Patients who withdrew consent for evaluation of their medical  
8  
9 402 data were excluded in accordance with legal requirements.

10  
11 403 **Consent for publication:** Not applicable

12  
13 404 **Availability of data and materials:** The datasets used and/or analyzed during the current study are  
14  
15 405 available from the corresponding author on reasonable request.

16  
17 406 **Competing interests:** None of the investigators has any relevant financial interests, activities,  
18  
19 407 relationships, or affiliations that represent a relevant financial conflict of interest with respect to the  
20  
21 408 conduct or analysis of this study.

22  
23  
24 409 **Funding:** This study was supported by the Swiss National Science Foundation #320030\_173081.

25  
26 410 **Authors' contributions:** AK, EZ, FN and LC collected and processed the data. GM and LC conceived  
27  
28 411 the study, analyzed and interpreted the data and wrote the draft. MC, TS, FW and SJ were involved in  
29  
30 412 the interpretation of the data and in the review. All authors discussed the results, commented on the  
31  
32 413 manuscript, and read and approved the final version.

33  
34 414 **Acknowledgements:** We thank Prof. Dr. Wolf Hutz for his valuable suggestions and review of the  
35  
36 415 manuscript.

## 416 REFERENCES

- 417 1 Bisdorff AR, Staab JP, Newman-Toker DE. Overview of the International Classification of  
418 Vestibular Disorders. *Neurol Clin* 2015;**33**:541–50. doi:10.1016/j.ncl.2015.04.010
- 419 2 Tarnutzer AA, Berkowitz AL, Robinson KA, *et al*. Does my dizzy patient have a stroke? A  
420 systematic review of bedside diagnosis in acute vestibular syndrome. *CMAJ Can Med Assoc J J*  
421 *Assoc Medicale Can* 2011;**183**:E571-592. doi:10.1503/cmaj.100174
- 422 3 Bisdorff A. Chapter 6 - Vestibular symptoms and history taking. In: Furman JM, Lempert T, eds.  
423 *Handbook of Clinical Neurology*. Elsevier 2016. 83–90. doi:10.1016/B978-0-444-63437-5.00006-6
- 424 4 Edlow JA. Diagnosing dizziness: we are teaching the wrong paradigm! *Acad Emerg Med Off J*  
425 *Soc Acad Emerg Med* 2013;**20**:1064–6. doi:10.1111/acem.12234
- 426 5 Newman-Toker DE, Cannon LM, Stofferahn ME, *et al*. Imprecision in Patient Reports of Dizziness  
427 Symptom Quality: A Cross-sectional Study Conducted in an Acute Care Setting. *Mayo Clin Proc*  
428 2007;**82**:1329–40. doi:10.4065/82.11.1329
- 429 6 ICD-11 for Mortality and Morbidity Statistics. [https://icd.who.int/dev11/l-](https://icd.who.int/dev11/l-m/en#/http%3a%2f%2fid.who.int%2fid%2fentity%2f1462112221)  
430 [m/en#/http%3a%2f%2fid.who.int%2fid%2fentity%2f1462112221](https://icd.who.int/dev11/l-m/en#/http%3a%2f%2fid.who.int%2fid%2fentity%2f1462112221) (accessed 27 Jan 2022).
- 431 7 Mantokoudis G, Wyss T, Zamaro E, *et al*. Stroke Prediction Based on the Spontaneous  
432 Nystagmus Suppression Test in Dizzy Patients. *Neurology* 2021;**97**:e42–51.  
433 doi:10.1212/WNL.00000000000012176
- 434 8 Mantokoudis G, Korda A, Zee DS, *et al*. Bruns' nystagmus revisited: A sign of stroke in patients  
435 with the acute vestibular syndrome. *Eur J Neurol* 2021;**28**:2971–9. doi:10.1111/ene.14997
- 436 9 Morrison M, Korda A, Zamaro E, *et al*. Paradigm shift in acute dizziness: is caloric testing  
437 obsolete? *J Neurol* 2022;**269**:853–60. doi:10.1007/s00415-021-10667-7
- 438 10 Korda A, Zamaro E, Wagner F, *et al*. Acute vestibular syndrome: is skew deviation a central sign?  
439 *J Neurol* Published Online First: 9 July 2021. doi:10.1007/s00415-021-10692-6
- 440 11 Newman-Toker DE, Edlow JA. TiTrATE: A Novel, Evidence-Based Approach to Diagnosing Acute  
441 Dizziness and Vertigo. *Neurol Clin* 2015;**33**:577–99, viii. doi:10.1016/j.ncl.2015.04.011
- 442 12 Machner B, Choi JH, Trillenber P, *et al*. Risk of acute brain lesions in dizzy patients presenting to  
443 the emergency room: who needs imaging and who does not? *J Neurol* 2020;**267**:126–35.  
444 doi:10.1007/s00415-020-09909-x
- 445 13 Zwergal A, Möhwald K, Dieterich M. Schwindel in der Notaufnahme. *Nervenarzt* 2017;**88**:587–96.  
446 doi:10.1007/s00115-017-0342-y
- 447 14 Fanciulli A, Campese N, Wenning GK. The Schellong test: detecting orthostatic blood pressure  
448 and heart rate changes in German-speaking countries. *Clin Auton Res* 2019;**29**:363–6.  
449 doi:10.1007/s10286-019-00619-7
- 450 15 Ljunggren M, Persson J, Salzer J. Dizziness and the Acute Vestibular Syndrome at the  
451 Emergency Department: A Population-Based Descriptive Study. *Eur Neurol* 2018;**79**:5–12.  
452 doi:10.1159/000481982
- 453 16 Newman-Toker DE, Hsieh Y-H, Camargo CA, *et al*. Spectrum of dizziness visits to US emergency  
454 departments: cross-sectional analysis from a nationally representative sample. *Mayo Clin Proc*  
455 2008;**83**:765–75. doi:10.4065/83.7.765
- 456 17 Royl G, Ploner CJ, Leithner C. Dizziness in the Emergency Room: Diagnoses and Misdiagnoses.  
457 *Eur Neurol* 2011;**66**:256–63. doi:10.1159/000331046

- 1  
2  
3 458 18 Bhattacharyya N, Gubbels SP, Schwartz SR, *et al*. Clinical Practice Guideline: Benign Paroxysmal  
4 459 Positional Vertigo (Update). *Otolaryngol Neck Surg* 2017;**156**:S1–47.  
5 460 doi:10.1177/0194599816689667  
6  
7 461 19 Kerber KA, Meurer WJ, West BT, *et al*. Dizziness presentations in U.S. emergency departments,  
8 462 1995-2004. *Acad Emerg Med Off J Soc Acad Emerg Med* 2008;**15**:744–50. doi:10.1111/j.1553-  
9 463 2712.2008.00189.x  
10  
11 464 20 Kerber KA, Brown DL, Lisabeth LD, *et al*. Stroke among patients with dizziness, vertigo, and  
12 465 imbalance in the emergency department: a population-based study. *Stroke* 2006;**37**:2484–7.  
13 466 doi:10.1161/01.STR.0000240329.48263.0d  
14  
15 467 21 Goeldlin M, Gaschen J, Kammer C, *et al*. Frequency, aetiology, and impact of vestibular  
16 468 symptoms in the emergency department: a neglected red flag. *J Neurol* 2019;**266**:3076–86.  
17 469 doi:10.1007/s00415-019-09525-4  
18  
19 470 22 Edlow JA, Newman-Toker D. Using the Physical Examination to Diagnose Patients with Acute  
20 471 Dizziness and Vertigo. *J Emerg Med* 2016;**50**:617–28. doi:10.1016/j.jemermed.2015.10.040  
21  
22 472 23 Hautz SC, Hoffmann M, Exadaktylos AK, *et al*. Digital competencies in medical education in  
23 473 Switzerland: an overview of the current situation. *GMS J Med Educ* 2020;**37**:Doc62.  
24 474 doi:10.3205/zma001355  
25  
26 475 24 Lempert T, Olesen J, Furman J, *et al*. Vestibular migraine: Diagnostic criteria. *J Vestib Res*  
27 476 2012;**22**:167–72. doi:10.3233/VES-2012-0453  
28  
29 477 25 Lopez-Escamez JA, Carey J, Chung W-H, *et al*. Diagnostic criteria for Meni&egrave;re’s disease.  
30 478 *J Vestib Res* 2015;**25**:1–7. doi:10.3233/VES-150549  
31  
32 479 26 Volgger V, Gurkov R. Acute vestibular syndrome in cerebellar stroke. *HNO* 2017;**65**:149–52.  
33 480 doi:10.1007/s00106-016-0315-7  
34  
35 481 27 Hautz WE. When I say... diagnostic error. *Med Educ* 2018;**52**:896–7. doi:10.1111/medu.13602  
36  
37 482 28 Newman-Toker DE. A unified conceptual model for diagnostic errors: underdiagnosis,  
38 483 overdiagnosis, and misdiagnosis. *Diagn Berl Ger* 2014;**1**:43–8. doi:10.1515/dx-2013-0027  
39  
40 484 29 Kerber KA, Newman-Toker DE. Misdiagnosing Dizzy Patients: Common Pitfalls in Clinical  
41 485 Practice. *Neurol Clin* 2015;**33**:565–75. doi:10.1016/j.ncl.2015.04.009  
42  
43 486 30 Hautz WE, Kammer JE, Hautz SC, *et al*. Diagnostic error increases mortality and length of  
44 487 hospital stay in patients presenting through the emergency room. *Scand J Trauma Resusc Emerg*  
45 488 *Med* 2019;**27**:54. doi:10.1186/s13049-019-0629-z  
46  
47 489 31 Saber Tehrani AS, Kattah JC, Mantokoudis G, *et al*. Small strokes causing severe vertigo.  
48 490 *Neurology* 2014;**83**:169–73. doi:10.1212/WNL.0000000000000573  
49  
50 491 32 Tarnutzer AA, Lee S-H, Robinson KA, *et al*. ED misdiagnosis of cerebrovascular events in the era  
51 492 of modern neuroimaging. *Neurology* 2017;**88**:1468–77. doi:10.1212/WNL.0000000000003814  
52  
53 493 33 Edlow JA, Gurley KL, Newman-Toker DE. A New Diagnostic Approach to the Adult Patient with  
54 494 Acute Dizziness. *J Emerg Med* 2018;**54**:469–83. doi:10.1016/j.jemermed.2017.12.024  
55  
56 495 34 Kattah Jorge C., Talkad Arun V., Wang David Z., *et al*. HINTS to Diagnose Stroke in the Acute  
57 496 Vestibular Syndrome. *Stroke* 2009;**40**:3504–10. doi:10.1161/STROKEAHA.109.551234  
58  
59 497 35 Mantokoudis G, Saber Tehrani AS, Wozniak A, *et al*. VOR Gain by Head Impulse Video-  
60 498 Oculography Differentiates Acute Vestibular Neuritis from Stroke. *Otol Neurotol* 2015;**36**:457–65.  
60 499 doi:10.1097/MAO.0000000000000638



- 1  
2  
3 500 36 Newman-Toker DE, Saber Tehrani AS, Mantokoudis G, *et al*. Quantitative Video-Oculography to  
4 501 Help Diagnose Stroke in Acute Vertigo and Dizziness. *Stroke* 2013;**44**:1158–61.  
5 502 doi:10.1161/STROKEAHA.111.000033  
6  
7 503 37 Mantokoudis G, Otero-Millan J, Gold DR. Current concepts in acute vestibular syndrome and  
8 504 video-oculography. *Curr Opin Neurol* 2022;**35**:75–83. doi:10.1097/WCO.0000000000001017  
9  
10 505 38 von Brevern M, Bertholon P, Brandt T, *et al*. Benign paroxysmal positional vertigo: Diagnostic  
11 506 criteria. *J Vestib Res* 2015;**25**:105–17. doi:10.3233/VES-150553  
12  
13 507 39 Müller M, Goeldlin MB, Gaschen J, *et al*. Characteristics and resource needs in patients with  
14 508 vestibular symptoms: a comparison of patients with symptoms of unknown versus determined  
15 509 origin. *BMC Emerg Med* 2020;**20**:70. doi:10.1186/s12873-020-00361-8  
16  
17 510 40 Hautz WE, Sauter TC, Hautz SC, *et al*. What determines diagnostic resource consumption in  
18 511 emergency medicine: patients, physicians or context? *Emerg Med J EMJ* 2020;**37**:546–51.  
19 512 doi:10.1136/emered-2019-209022  
20  
21 513 41 Comolli L, Goeldlin M, Gaschen J, *et al*. Schwindelerkrankungen in einem tertiären HNO-  
22 514 Notfallzentrum. *HNO* 2020;**68**:763–72. doi:10.1007/s00106-020-00857-6  
23  
24 515 42 Shaban A, Zafar A, Borte B, *et al*. The Bucket Test Improves Detection of Stroke in Patients With  
25 516 Acute Dizziness. *J Emerg Med* 2021;**60**:485–94. doi:10.1016/j.jemermed.2020.10.052  
26  
27 517 43 Carmona S, Martínez C, Zalazar G, *et al*. The Diagnostic Accuracy of Truncal Ataxia and HINTS  
28 518 as Cardinal Signs for Acute Vestibular Syndrome. *Front Neurol* 2016;**7**:125.  
29 519 doi:10.3389/fneur.2016.00125  
30  
31 520 44 Aroor S, Singh R, Goldstein LB. BE-FAST (Balance, Eyes, Face, Arm, Speech, Time). *Stroke*  
32 521 2017;**48**:479–81. doi:10.1161/STROKEAHA.116.015169  
33  
34 522 45 Newman-Toker DE, Kerber KA, Hsieh Y-H, *et al*. HINTS Outperforms ABCD2 to Screen for Stroke  
35 523 in Acute Continuous Vertigo and Dizziness. *Acad Emerg Med* 2013;**20**:986–96.  
36 524 doi:10.1111/acem.12223  
37  
38  
39  
40  
41  
42  
43  
44  
45  
46  
47  
48  
49  
50  
51  
52  
53  
54  
55  
56  
57  
58  
59  
60

Vestibular syndromes, diagnosis and diagnostic errors in dizzy patients presenting to the emergency department. (Comolli et al.)

APPENDIX

Figure S1



review only

Frequencies of vestibular syndromes, diagnosis and misdiagnosis rates in a tertiary emergency department (Comolli et al.)

**Table S1: Cross table diagnoses emergency department (ED) vs. Follow-up**

Bold cases represent the 29/662 (4.4%) cases where a dangerous diagnosis was found during follow-up but not during ED workup

|                                               | Diagnoses follow up   |      |                                               |          |              |                     |                   |          |           |          |                      |               |               |                    |                     |                           |                  |           |            |                                              | Change of diagnoses at follow-up <sup>2)</sup> |                                  |
|-----------------------------------------------|-----------------------|------|-----------------------------------------------|----------|--------------|---------------------|-------------------|----------|-----------|----------|----------------------|---------------|---------------|--------------------|---------------------|---------------------------|------------------|-----------|------------|----------------------------------------------|------------------------------------------------|----------------------------------|
|                                               | Stroke / Minor Stroke | BPPV | Vestibular Deficit (e.g. Vestibular Neuritis) | TIA      | Dysautonomia | Vestibular migraine | Menière's disease | PPPD     | Tumor     | Trauma   | Medical side effects | Heart disease | Labyrinthitis | Infectious disease | Metabolic disorders | Neurodegenerative disease | Acoustic neuroma | Others    | unknown    | unknown etiology central vestibular syndrome |                                                | Total Diagnoses ED <sup>1)</sup> |
| Stroke / Minor Stroke                         | 114                   | 0    | 4                                             | 5        | 1            | 0                   | 0                 | 0        | 0         | 0        | 0                    | 0             | 0             | 0                  | 0                   | 0                         | 0                | 1         | 4          | 3                                            | 132                                            | 13.6%                            |
| BPPV                                          | <b>2</b>              | 20   | 3                                             | 0        | 0            | 0                   | 0                 | 0        | 0         | 0        | 0                    | 0             | 1             | 0                  | 0                   | 0                         | 0                | 2         | 2          | 0                                            | 28                                             | 28.6%                            |
| Vestibular Deficit (e.g. Vestibular Neuritis) | <b>2</b>              | 0    | 75                                            | <b>1</b> | 0            | 1                   | 2                 | 0        | 0         | 0        | 0                    | 0             | 1             | 0                  | 0                   | 1                         | 1                | 2         | 6          | 0                                            | 89                                             | 15.7%                            |
| TIA                                           | 7                     | 1    | 0                                             | 34       | 0            | 0                   | 0                 | 0        | 0         | 0        | 1                    | 0             | 0             | 0                  | 1                   | 0                         | 0                | 0         | 4          | 1                                            | 49                                             | 30.6%                            |
| Dysautonomia                                  | 0                     | 0    | 0                                             | 0        | <b>6</b>     | 0                   | 0                 | 0        | 0         | 0        | 1                    | 2             | 0             | 0                  | 0                   | 0                         | 0                | 2         | 0          | 0                                            | 9                                              | 33.3%                            |
| Vestibular migraine                           | 0                     | 0    | 0                                             | 0        | 0            | <b>9</b>            | 0                 | 1        | 0         | 0        | 0                    | 0             | 0             | 0                  | 0                   | 0                         | 0                | 2         | 1          | 0                                            | 12                                             | 25.0%                            |
| Menière's disease                             | 0                     | 0    | 3                                             | 0        | 0            | 0                   | <b>11</b>         | 0        | 0         | 0        | 0                    | 0             | 1             | 0                  | 0                   | 0                         | 0                | 1         | 0          | 0                                            | 15                                             | 26.7%                            |
| PPPD                                          | 0                     | 0    | 0                                             | 0        | 0            | 1                   | 0                 | <b>5</b> | 0         | 0        | 0                    | 0             | 0             | 0                  | 0                   | 0                         | 0                | 0         | 0          | 0                                            | 5                                              | 0.0%                             |
| Tumor                                         | 0                     | 0    | 0                                             | 0        | 0            | 0                   | 0                 | 0        | <b>13</b> | 0        | 0                    | 0             | 0             | 0                  | 0                   | 0                         | 0                | 0         | 1          | 0                                            | 14                                             | 7.1%                             |
| Trauma                                        | 0                     | 0    | 0                                             | 0        | 0            | 0                   | 0                 | 0        | 0         | <b>3</b> | 0                    | 0             | 0             | 0                  | 0                   | 0                         | 0                | 0         | 0          | 0                                            | 3                                              | 0.0%                             |
| Medical side effects                          | <b>1</b>              | 0    | 0                                             | 0        | 0            | 0                   | 0                 | 0        | 0         | 0        | <b>2</b>             | 0             | 0             | 0                  | 0                   | 0                         | 0                | 0         | 0          | 0                                            | 3                                              | 33.3%                            |
| Heart disease                                 | 0                     | 0    | 0                                             | 0        | 0            | 0                   | 0                 | 0        | 0         | 0        | 0                    | <b>5</b>      | 0             | 0                  | 0                   | 0                         | 0                | 0         | 0          | 0                                            | 5                                              | 0.0%                             |
| Labyrinthitis                                 | 0                     | 0    | 1                                             | 0        | 0            | 0                   | 0                 | 0        | 0         | 0        | 0                    | 0             | <b>5</b>      | <b>3</b>           | 0                   | 0                         | 1                | 0         | 0          | 0                                            | 7                                              | 28.6%                            |
| Infectious disease                            | 0                     | 0    | 3                                             | 0        | 0            | 0                   | 0                 | 0        | 0         | 0        | 0                    | 0             | 1             | <b>3</b>           | 0                   | 0                         | 0                | 0         | 0          | 0                                            | 6                                              | 50.0%                            |
| Metabolic disorders                           | 0                     | 0    | 0                                             | 0        | 0            | 0                   | 0                 | 0        | 0         | 0        | 0                    | 0             | 0             | 0                  | <b>1</b>            | 0                         | 0                | 0         | 0          | 0                                            | 1                                              | 0.0%                             |
| Neurodegenerative disease                     | 0                     | 0    | 0                                             | 0        | 0            | 0                   | 0                 | 0        | 0         | 0        | 0                    | 0             | 0             | 0                  | 0                   | <b>2</b>                  | 0                | 1         | 0          | 0                                            | 3                                              | 33.3%                            |
| Acoustic neuroma                              | 0                     | 0    | 0                                             | 0        | 0            | 0                   | 0                 | 0        | 0         | 0        | 0                    | 0             | 1             | 0                  | 0                   | 0                         | <b>4</b>         | 0         | 0          | 0                                            | 4                                              | 0.0%                             |
| Others                                        | 0                     | 1    | 0                                             | 0        | 2            | 0                   | 0                 | 0        | 1         | 0        | 0                    | 0             | 0             | 0                  | 0                   | 0                         | 0                | <b>38</b> | 1          | 0                                            | 42                                             | 9.5%                             |
| unknown                                       | <b>14</b>             | 6    | 35                                            | <b>9</b> | 8            | 22                  | 8                 | 6        | 1         | 0        | 1                    | 1             | 1             | 1                  | 3                   | 0                         | 0                | 28        | <b>104</b> | 4                                            | 249                                            | 58.2%                            |
| Total Diagnoses Follow up <sup>1)</sup>       | 138                   | 28   | 122                                           | 49       | 17           | 32                  | 21                | 11       | 15        | 3        | 4                    | 8             | 9             | 5                  | 5                   | 3                         | 5                | 73        | 122        | 8                                            | 662                                            |                                  |

<sup>1)</sup>The fields "total" refer to the number of the corresponding diagnosis. Since several diagnoses are possible, the columns and rows do not add up.

<sup>2)</sup> The rate of changes of diagnoses at follow-up is calculated as follows:  $100 * (1 - \text{correct diagnoses (grey fields)} / \text{total diagnoses ED})$

BPPV = benign paroxysmal positional vertigo; TIA= transient ischemic attack; PPPD = persistent postural-perceptual dizziness

**STROBE 2007 (v4) Statement—Checklist of items that should be included in reports of *cohort studies***

| Section/Topic                | Item # | Recommendation                                                                                                                                                                       | Reported on page # |
|------------------------------|--------|--------------------------------------------------------------------------------------------------------------------------------------------------------------------------------------|--------------------|
| Title and abstract           | 1      | (a) Indicate the study's design with a commonly used term in the title or the abstract                                                                                               | 2                  |
|                              |        | (b) Provide in the abstract an informative and balanced summary of what was done and what was found                                                                                  | 2                  |
| <b>Introduction</b>          |        |                                                                                                                                                                                      |                    |
| Background/rationale         | 2      | Explain the scientific background and rationale for the investigation being reported                                                                                                 | 3/4                |
| Objectives                   | 3      | State specific objectives, including any prespecified hypotheses                                                                                                                     | 4                  |
| <b>Methods</b>               |        |                                                                                                                                                                                      |                    |
| Study design                 | 4      | Present key elements of study design early in the paper                                                                                                                              | 4                  |
| Setting                      | 5      | Describe the setting, locations, and relevant dates, including periods of recruitment, exposure, follow-up, and data collection                                                      | 4                  |
| Participants                 | 6      | (a) Give the eligibility criteria, and the sources and methods of selection of participants. Describe methods of follow-up                                                           | 4                  |
|                              |        | (b) For matched studies, give matching criteria and number of exposed and unexposed                                                                                                  | NA                 |
| Variables                    | 7      | Clearly define all outcomes, exposures, predictors, potential confounders, and effect modifiers. Give diagnostic criteria, if applicable                                             | 4-6                |
| Data sources/<br>measurement | 8*     | For each variable of interest, give sources of data and details of methods of assessment (measurement). Describe comparability of assessment methods if there is more than one group | 6                  |
| Bias                         | 9      | Describe any efforts to address potential sources of bias                                                                                                                            | NA                 |
| Study size                   | 10     | Explain how the study size was arrived at                                                                                                                                            | 4                  |
| Quantitative variables       | 11     | Explain how quantitative variables were handled in the analyses. If applicable, describe which groupings were chosen and why                                                         | 6                  |
| Statistical methods          | 12     | (a) Describe all statistical methods, including those used to control for confounding                                                                                                | 6                  |
|                              |        | (b) Describe any methods used to examine subgroups and interactions                                                                                                                  | 6                  |
|                              |        | (c) Explain how missing data were addressed                                                                                                                                          | 5/6                |
|                              |        | (d) If applicable, explain how loss to follow-up was addressed                                                                                                                       | not applicable     |
|                              |        | (e) Describe any sensitivity analyses                                                                                                                                                | not applicable     |
| <b>Results</b>               |        |                                                                                                                                                                                      |                    |

|                          |     |                                                                                                                                                                                                              |                |
|--------------------------|-----|--------------------------------------------------------------------------------------------------------------------------------------------------------------------------------------------------------------|----------------|
| Participants             | 13* | (a) Report numbers of individuals at each stage of study—eg numbers potentially eligible, examined for eligibility, confirmed eligible, included in the study, completing follow-up, and analysed            | 6/7            |
|                          |     | (b) Give reasons for non-participation at each stage                                                                                                                                                         | 16             |
|                          |     | (c) Consider use of a flow diagram                                                                                                                                                                           | NA             |
| Descriptive data         | 14* | (a) Give characteristics of study participants (eg demographic, clinical, social) and information on exposures and potential confounders                                                                     | 6              |
|                          |     | (b) Indicate number of participants with missing data for each variable of interest                                                                                                                          | 6-11           |
|                          |     | (c) Summarise follow-up time (eg, average and total amount)                                                                                                                                                  | 7/8            |
| Outcome data             | 15* | Report numbers of outcome events or summary measures over time                                                                                                                                               | 6-11           |
| Main results             | 16  | (a) Give unadjusted estimates and, if applicable, confounder-adjusted estimates and their precision (eg, 95% confidence interval). Make clear which confounders were adjusted for and why they were included | not applicable |
|                          |     | (b) Report category boundaries when continuous variables were categorized                                                                                                                                    | not applicable |
|                          |     | (c) If relevant, consider translating estimates of relative risk into absolute risk for a meaningful time period                                                                                             | not applicable |
| Other analyses           | 17  | Report other analyses done—eg analyses of subgroups and interactions, and sensitivity analyses                                                                                                               | 8              |
| <b>Discussion</b>        |     |                                                                                                                                                                                                              |                |
| Key results              | 18  | Summarise key results with reference to study objectives                                                                                                                                                     | 11-15          |
| <b>Limitations</b>       |     |                                                                                                                                                                                                              |                |
| Interpretation           | 20  | Give a cautious overall interpretation of results considering objectives, limitations, multiplicity of analyses, results from similar studies, and other relevant evidence                                   | 14-15          |
| Generalisability         | 21  | Discuss the generalisability (external validity) of the study results                                                                                                                                        | 12-14          |
| <b>Other information</b> |     |                                                                                                                                                                                                              |                |
| Funding                  | 22  | Give the source of funding and the role of the funders for the present study and, if applicable, for the original study on which the present article is based                                                | 16             |

\*Give information separately for cases and controls in case-control studies and, if applicable, for exposed and unexposed groups in cohort and cross-sectional studies.

**Note:** An Explanation and Elaboration article discusses each checklist item and gives methodological background and published examples of transparent reporting. The STROBE checklist is best used in conjunction with this article (freely available on the Web sites of PLoS Medicine at <http://www.plosmedicine.org/>, Annals of Internal Medicine at <http://www.annals.org/>, and Epidemiology at <http://www.epidem.com/>). Information on the STROBE Initiative is available at [www.strobe-statement.org](http://www.strobe-statement.org).
