# Supplementary material for: Vestibular syndromes, diagnosis and diagnostic errors in patients with dizziness presenting to the emergency department: a cross-sectional study
Source: PubMed Central journal article supplement (PMC10040076; doi:10.1136/bmjopen-2022-064057), 2023-03-24
Supplement: bmjopen-2022-064057supp001.pdf [file bmjopen-2022-064057supp001.pdf]

Vestibular syndromes, diagnosis and diagnostic errors in dizzy patients presenting to the emergency department. (Comolli et al.)

## APPENDIX

**Figure S1**

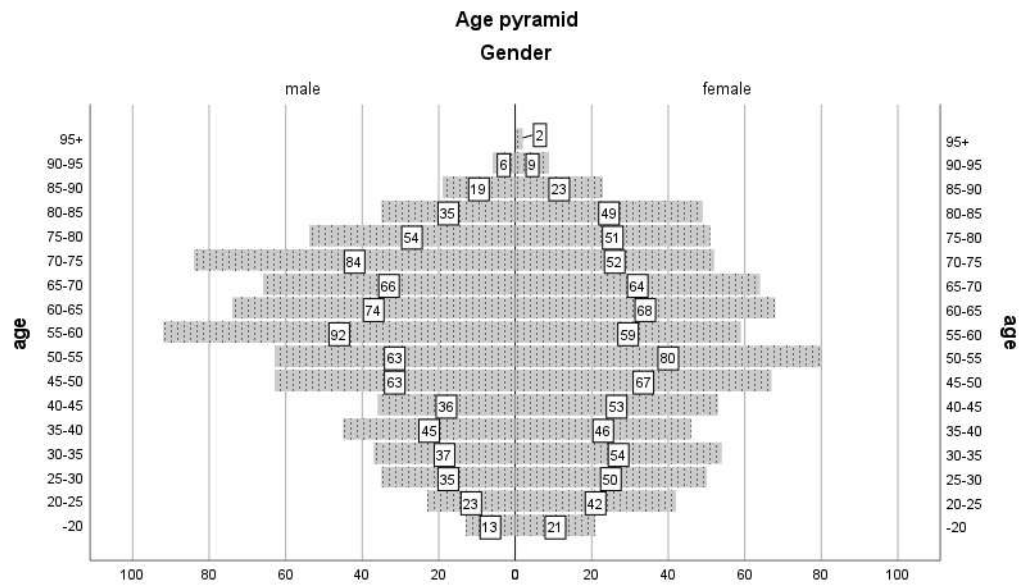

Frequencies of vestibular syndromes, diagnosis and misdiagnosis rates in a tertiary emergency department (Comolli et al.)

**Table S1: Cross table diagnoses emergency department (ED) vs. Follow-up**

Bold cases represent the 29/662 (4.4%) cases where a dangerous diagnosis was found during follow-up but not during ED workup

|                                               | Diagnoses follow up   |      |                                               |     |              |                     |                   |      |       |        |                      |               |               |                    |                     |                           |                  |        |         |                                              | Change of diagnoses at follow-up <sup>2)</sup> |                                  |
|-----------------------------------------------|-----------------------|------|-----------------------------------------------|-----|--------------|---------------------|-------------------|------|-------|--------|----------------------|---------------|---------------|--------------------|---------------------|---------------------------|------------------|--------|---------|----------------------------------------------|------------------------------------------------|----------------------------------|
|                                               | Stroke / Minor Stroke | BPPV | Vestibular Deficit (e.g. Vestibular Neuritis) | TIA | Dysautonomia | Vestibular migraine | Menière's disease | PPPD | Tumor | Trauma | Medical side effects | Heart disease | Labyrinthitis | Infectious disease | Metabolic disorders | Neurodegenerative disease | Acoustic neuroma | Others | unknown | unknown etiology central vestibular syndrome |                                                | Total Diagnoses ED <sup>1)</sup> |
| Stroke / Minor Stroke                         | 114                   | 0    | 4                                             | 5   | 1            | 0                   | 0                 | 0    | 0     | 0      | 0                    | 0             | 0             | 0                  | 0                   | 0                         | 0                | 1      | 4       | 3                                            | 132                                            | 13.6%                            |
| BPPV                                          | 2                     | 20   | 3                                             | 0   | 0            | 0                   | 0                 | 0    | 0     | 0      | 0                    | 0             | 1             | 0                  | 0                   | 0                         | 0                | 2      | 2       | 0                                            | 28                                             | 28.6%                            |
| Vestibular Deficit (e.g. Vestibular Neuritis) | 2                     | 0    | 75                                            | 1   | 0            | 1                   | 2                 | 0    | 0     | 0      | 0                    | 0             | 1             | 0                  | 0                   | 1                         | 1                | 2      | 6       | 0                                            | 89                                             | 15.7%                            |
| TIA                                           | 7                     | 1    | 0                                             | 34  | 0            | 0                   | 0                 | 0    | 0     | 0      | 1                    | 0             | 0             | 0                  | 1                   | 0                         | 0                | 0      | 4       | 1                                            | 49                                             | 30.6%                            |
| Dysautonomia                                  | 0                     | 0    | 0                                             | 0   | 6            | 0                   | 0                 | 0    | 0     | 0      | 1                    | 2             | 0             | 0                  | 0                   | 0                         | 0                | 2      | 0       | 0                                            | 9                                              | 33.3%                            |
| Vestibular migraine                           | 0                     | 0    | 0                                             | 0   | 0            | 9                   | 0                 | 1    | 0     | 0      | 0                    | 0             | 0             | 0                  | 0                   | 0                         | 0                | 2      | 1       | 0                                            | 12                                             | 25.0%                            |
| Menière's disease                             | 0                     | 0    | 3                                             | 0   | 0            | 0                   | 11                | 0    | 0     | 0      | 0                    | 0             | 1             | 0                  | 0                   | 0                         | 0                | 1      | 0       | 0                                            | 15                                             | 26.7%                            |
| PPPD                                          | 0                     | 0    | 0                                             | 0   | 0            | 1                   | 0                 | 5    | 0     | 0      | 0                    | 0             | 0             | 0                  | 0                   | 0                         | 0                | 0      | 0       | 0                                            | 5                                              | 0.0%                             |
| Tumor                                         | 0                     | 0    | 0                                             | 0   | 0            | 0                   | 0                 | 0    | 13    | 0      | 0                    | 0             | 0             | 0                  | 0                   | 0                         | 0                | 0      | 1       | 0                                            | 14                                             | 7.1%                             |
| Trauma                                        | 0                     | 0    | 0                                             | 0   | 0            | 0                   | 0                 | 0    | 0     | 3      | 0                    | 0             | 0             | 0                  | 0                   | 0                         | 0                | 0      | 0       | 0                                            | 3                                              | 0.0%                             |
| Medical side effects                          | 1                     | 0    | 0                                             | 0   | 0            | 0                   | 0                 | 0    | 0     | 0      | 2                    | 0             | 0             | 0                  | 0                   | 0                         | 0                | 0      | 0       | 0                                            | 3                                              | 33.3%                            |
| Heart disease                                 | 0                     | 0    | 0                                             | 0   | 0            | 0                   | 0                 | 0    | 0     | 0      | 0                    | 5             | 0             | 0                  | 0                   | 0                         | 0                | 0      | 0       | 0                                            | 5                                              | 0.0%                             |
| Labyrinthitis                                 | 0                     | 0    | 1                                             | 0   | 0            | 0                   | 0                 | 0    | 0     | 0      | 0                    | 0             | 5             | 3                  | 0                   | 0                         | 1                | 0      | 0       | 0                                            | 7                                              | 28.6%                            |
| Infectious disease                            | 0                     | 0    | 3                                             | 0   | 0            | 0                   | 0                 | 0    | 0     | 0      | 0                    | 0             | 1             | 3                  | 0                   | 0                         | 0                | 0      | 0       | 0                                            | 6                                              | 50.0%                            |
| Metabolic disorders                           | 0                     | 0    | 0                                             | 0   | 0            | 0                   | 0                 | 0    | 0     | 0      | 0                    | 0             | 0             | 1                  | 0                   | 0                         | 0                | 0      | 0       | 0                                            | 1                                              | 0.0%                             |
| Neurodegenerative disease                     | 0                     | 0    | 0                                             | 0   | 0            | 0                   | 0                 | 0    | 0     | 0      | 0                    | 0             | 0             | 0                  | 2                   | 0                         | 1                | 0      | 0       | 0                                            | 3                                              | 33.3%                            |
| Acoustic neuroma                              | 0                     | 0    | 0                                             | 0   | 0            | 0                   | 0                 | 0    | 0     | 0      | 0                    | 0             | 1             | 0                  | 0                   | 0                         | 4                | 0      | 0       | 0                                            | 4                                              | 0.0%                             |
| Others                                        | 0                     | 1    | 0                                             | 0   | 2            | 0                   | 0                 | 0    | 1     | 0      | 0                    | 0             | 0             | 0                  | 0                   | 0                         | 38               | 1      | 0       | 0                                            | 42                                             | 9.5%                             |
| unknown                                       | 14                    | 6    | 35                                            | 9   | 8            | 22                  | 8                 | 6    | 1     | 0      | 1                    | 1             | 1             | 1                  | 3                   | 0                         | 0                | 28     | 104     | 4                                            | 249                                            | 58.2%                            |
| Total Diagnoses Follow up <sup>1)</sup>       | 138                   | 28   | 122                                           | 49  | 17           | 32                  | 21                | 11   | 15    | 3      | 4                    | 8             | 9             | 5                  | 5                   | 3                         | 5                | 73     | 122     | 8                                            | 662                                            |                                  |

<sup>1)</sup>The fields "total" refer to the number of the corresponding diagnosis. Since several diagnoses are possible, the columns and rows do not add up.

<sup>2)</sup> The rate of changes of diagnoses at follow-up is calculated as follows:  $100 * (1 - \text{correct diagnoses (grey fields)} / \text{total diagnoses ED})$

BPPV = benign paroxysmal positional vertigo; TIA= transient ischemic attack; PPPD = persistent postural-perceptual dizziness
